# Online sexual, reproductive, and transgender healthcare for LGBTQI+ youth: A scoping review

Julie McLeod<sup>1\*</sup>, Claudia S. Estcourt<sup>1&</sup>, Paul Flowers<sup>2&</sup>, Jo Gibbs<sup>3</sup>, and Jennifer MacDonald<sup>1</sup>

<sup>1</sup> School of Health and Life Sciences, Glasgow Caledonian University, Glasgow, Scotland, UK

<sup>2</sup> Psychological Science and Health, University of Strathclyde, Glasgow, Scotland, UK

<sup>3</sup> Institute for Global Health, University College London, London, England, UK

**\* Corresponding author:**

Email: [julie.mcleod@gcu.ac.uk](mailto:julie.mcleod@gcu.ac.uk)

<sup>&</sup>These authors contributed equally to this manuscript.

## Abstract

**Background.** Lesbian, gay, bisexual, trans, queer, questioning, intersex, and other sexual and gender minority (LGBTQI+) youth have poor sexual and reproductive health outcomes and low uptake of sexual and reproductive healthcare (SRHC). Online SRHC and transgender healthcare could overcome known barriers to in-person SRHC, such as confidentiality concerns. Therefore, we aimed to describe existing literature on online SRHC and transgender healthcare for LGBTQI+ youth, synthesise study findings, and make recommendations for future research.

**Methods.** We conducted a scoping review following the Joanna-Briggs Institute methodology. Eligibility were online SRHC and transgender healthcare for LGBTQI+ youth (aged 10-35 years) in high-income countries. Search strings were framed around the eligibility criteria and 265 search terms were selected to identify published literature from nine databases. Searches were exported to Rayyan and studies screened by two reviewers. Data from included studies were extracted to Excel and analyzed descriptively.

**Results:** Of 91 included papers, 41 were quantitative, 26 were qualitative, and 24 were mixed methods. Seventy-one papers focused on sexual health (HIV/sexually transmitted infection (STI) prevention 52/71; HIV management 9/71; sexual health *per se* 9/71; and HIV stigma reduction 2/71); 3/91 on reproductive health (pregnancy prevention 2/3); 2/91 sexual and reproductive health; and 16/91 on transgender health (gender identity/transition *per se* 8/16; gender affirming care 8/16). Papers explored the provision of or engagement with education/information (72/91); non-clinical support (56/91, e.g., reminders for HIV/STI testing); and clinical care (18/91) for sexual health (10/18, e.g., home HIV/STI self-sampling kits 6/10) or transgender health (8/18, i.e., eConsultation with a healthcare provider 8/8). Studies targeted young men who have sex with men (62/91) for sexual health; trans and gender diverse youth (26/91) for transgender healthcare (16/26) and sexual health (14/26); LGBTQI+ youth (6/91); and young sexual minority women (4/91) for reproductive health (3/4) and sexual and reproductive health (1/4).

**Conclusions:** There is a large and varied literature base for online SRHC and transgender healthcare for LGBTQI+ youth. However, most research focused on sexual healthcare, particularly HIV/STI prevention, for men who have sex with men. Very little explored reproduction or sexual health other than HIV prevention. Young sexual minority women and trans and gender diverse youth are notably under-researched for online SRHC. Research is needed to understand how to enhance the potential of online healthcare for LGBTQI+ youth.

**Keywords:** young people; young adults; adolescents; sexual and gender minorities; digital health; eHealth

## Introduction

Lesbian, gay, bisexual, trans, queer, questioning, intersex, and other sexual orientation and gender diverse (LGBTQI+) youth (e.g., aged 10-35 years) face a disproportionate burden of poor sexual and reproductive health, including high rates of sexually transmitted infections (STIs) and blood borne viruses (BBVs), sexual violence and abuse, low sexual wellbeing, and unplanned pregnancy at a young age (1–10) (see S1 Appendix for definitions of key terms used throughout this paper). In particular, young gay, bisexual and other men who have sex with men (GBMSM) and trans women who have sex with men are at higher risk for STIs and BBVs (1–5) and young bisexual women and trans youth are at higher risk for unplanned pregnancy and sexual violence and abuse (1–3,5,7–9). Additionally, LGBTQI+ youth have low uptake of sexual and reproductive healthcare (SRHC), such as testing for STIs/BBVs, getting vaccinated for human papilloma virus, and uptake of pre-exposure prophylaxis (PrEP) (11–16). LGBTQI+ youth also face considerable barriers to engaging with care (1,2), including confidentiality concerns, lack of perceived risk or necessity, discrimination and stigma, healthcare providers' lack of knowledge and training about their needs, and heteronormative assumptions of their gender and sexuality (17–21). When considering these inequalities, it is important to be cognizant of the intersectionality of gender and sexual orientation with other socio-economic demographics/characteristics associated with increased risk of poor outcomes, such as race/ethnicity and socio-economic status (22–24). In the United Kingdom (UK) and United States of America (USA), young Black GBMSM bear the largest burden of HIV incidence (6,25,26). Further, stigma experienced by young LGBTQI+ people of color in the USA and Canada can impact identity disclosure to healthcare provider and decisions about uptake of PrEP (27). The delivery of SRHC online (i.e., via websites, mobile apps, web apps) has the potential to increase uptake of sexual and reproductive health and improve sexual and reproductive health outcomes among LGBTQI+ youth by overcoming the barriers to in-person services (28–33). However, research into online SRHC innovations often focuses on

general populations rather than specifically LGBTQI+ youth (e.g., 34–38), risking online services not meeting the needs of LGBTQI+ youth.

In addition, for trans and gender diverse youth, a critical issue for sexual and reproductive health is transgender health. Based on the premise that gender and sex are distinct (39) and some individuals can experience emotional distress due to incongruence between their gender and sex (40), known as gender dysphoria, transgender health refers to the ability for trans and gender diverse individuals to live in the gender that feels most authentic and comfortable. Gender dysphoria and related anxiety and depression can negatively impact trans and gender diverse people's uptake of SRHC (41,42). Equally, receiving gender affirming care (medical care such as hormones and/or surgery to affirm one's gender and align their body and gender identity) is also associated with increased use of SRHC among trans and gender diverse youth, such as STI testing and awareness of PrEP (43). However, trans and gender diverse youth also face barriers to gender affirming care, in particular, long wait times (typically years for a consultation) (44–46). Furthermore, transgender healthcare (broader than gender affirming care, including information, support, and clinical care regarding gender identity, expression, and transition (47)) is also intrinsically interlinked with reproductive healthcare, as a key aspect of transgender healthcare can be fertility preservation or assistance (48,49). Thus, the delivery of integrated SRHC and transgender healthcare has the potential to increase uptake of SRHC and improve sexual and reproductive health outcomes among transgender youth. Recent research from Australia found that co-located sexual and reproductive health and gender clinics with both sexual and reproductive health and endocrinology physicians facilitated access to gender affirming care, STI screening, contraception, and cervical screening for trans populations (50). Moreover, transgender women in the USA living with HIV have expressed that integrated HIV care and gender affirming care would be more accessible than current non-integrated services (51). However, SRHC and transgender healthcare are typically delivered and studied separately, and existing research has largely focused on

adult populations. The extent of literature into transgender healthcare, delivered both individually and with SRHC, for LGBTQI+ youth is unclear.

Given that online healthcare and the integration of SRHC and transgender healthcare have the potential to overcome key barriers for LGBTQI+, it is critical to understand how online SRHC and transgender health can best be designed and delivered for LGBTQI+ youth. However, online SRHC is broad, covering a wide range of 'areas' of sexual and reproductive health (e.g., infection, wellbeing, violence/abuse, fertility), healthcare types (e.g., information, support, and clinical care for prevention, testing, treatment, management, assistance), and online platforms (e.g., websites, mobile apps, web apps). Therefore, the extent and nature of research regarding online SRHC and transgender healthcare for LGBTQI+ youth is unclear. A review is needed to map existing literature and identify where there are gaps in research (52,53) regarding online SRHC and transgender healthcare for LGBTQI+ youth in order to understand where future intervention and service efforts should focus to improve the uptake of online SRHC and sexual and reproductive health outcomes among LGBTQI+ youth. Thus, the objective of this current study was to identify and describe existing literature on online SRHC and transgender healthcare for LGBTQI+ youth, synthesize study findings, and make recommendations for future research. Three research questions (RQs) were addressed:

- RQ1: What types of online sexual and reproductive healthcare and transgender healthcare have received attention for LGBTQI+ youth and where are there gaps?
- RQ2: Who are the target LGBTQI+ youth populations of online sexual and reproductive healthcare and transgender healthcare research, which additional intersectional characteristics have been considered, and where are there gaps?
- RQ3: How, if at all, have theories, models, and frameworks been used in research into online sexual and reproductive healthcare and transgender healthcare for LGBTQI+ youth?

## Methods

### Design

A systematic scoping review in accordance with the Joanna-Briggs Institute (JBI) methodology for scoping reviews (52–54).

### Protocol registration

The protocol was published in medRxiv (55). See S2 Appendix for protocol deviations.

### Eligibility criteria

Using the Participant, Concept, Context (PCC) framework (53), we included research regarding LGBTQI+ youth aged 10-35 years (Participants); online SRHC and transgender healthcare (Concept); and studies from high-income and developed economy countries (56,57) (Context) published in the past five years (2018-2023). See the protocol and S3 Appendix for detailed inclusion and exclusion criteria and their rationale.

### Types of sources

Only published literature was included. Qualitative, quantitative, and mixed methods studies that were classified as original research with primary data collection were included. Studies using theory-based implementation and behavioural science for intervention development and evaluation were also considered for inclusion. Pilot and feasibility studies were included. Reviews, conference abstracts, posters, registered reports, blogs, guidelines, text and opinion papers, letters, editorials, commentaries, protocols, preprints, and doctoral and master's theses were excluded. Studies

published in any language other than English were excluded, due to lack of resources to support translation.

## Search strategy

The PCC framework was used to structure the search, using only Participants and Concept. A preliminary search of MEDLINE, the Cochrane Database of Systematic Reviews, JBI Evidence Synthesis, and BMJ Open was conducted (31.01.2023) to identify articles on the topic. An analysis of the text words contained in the title and abstract of 10 retrieved papers (31,58–61) was conducted to develop a full search strategy of four search strings (Sexual orientation/ gender minority; Age; Online; and Type of health care) and 256 search terms (see S4 Appendix). A second search using all search terms was undertaken across nine databases (22.05.2023): APA PsycInfo (ProQuest); APA PsycArticles (ProQuest); CINAHL Complete (EBSCO); MEDLINE (EBSCO); ERIC (EBSCO); British Education Index (EBSCO); Education Database (ProQuest); Computer Science Database (ProQuest); and Web of Science.

## Study selection

All identified citations were exported to excel files and uploaded to Rayyan (62) and duplicates removed. The titles and abstracts of deduplicated studies were screened (100% by JMcl and 3% (n=178) by RO, see Acknowledgements) for assessment against the eligibility criteria. To prioritize the most relevant studies, the titles and abstracts screened by RO were ordered from most to least relevant, using the 'Compute Ratings' function within Rayyan which uses artificial intelligence to calculate the probability of inclusion based on decision patterns (62). The full text of studies categorized as included and maybe were then assessed in detail against the eligibility criteria (100%



by JMCL and 10% (n=20) by RO). Of the 178 articles screened by both reviewers, there was 85% consistency. The conflicts were resolved through discussion and referral to the protocol.

## Data extraction and analysis

Data from included papers were extracted to excel by JMCL using a data extraction tool adapted (by JMCL) from the JBI Manual for Evidence charting table for data extraction synthesis (53). The tool was adapted and centered around the PCC framework for extracting relevant data for study details, RQ1, RQ2 and RQ3. The tool was piloted and refined using a relevant paper identified from the preliminary search (63). See S5 Appendix for the final data extraction tool and a narrative account of data extraction and analysis. No authors were contacted to request missing or additional data. Following extraction, analysis involved calculating frequency counts and percentages for study details and relevant data regarding each of the research questions. Analyses were then charted on tables and summarized narratively to provide an overview of the included papers for each of the research questions. Table 1 details data extraction for each of the relevant variables presented in the results.

**Table 1. Details of data extraction for variables presented in the results.**

| Research question | Variable         | Data extraction/categorization                                                                                                                                                                                                                                                                                                                                                                                                                                                                                                                                                                                                                                                                                                                                                                                                                        |
|-------------------|------------------|-------------------------------------------------------------------------------------------------------------------------------------------------------------------------------------------------------------------------------------------------------------------------------------------------------------------------------------------------------------------------------------------------------------------------------------------------------------------------------------------------------------------------------------------------------------------------------------------------------------------------------------------------------------------------------------------------------------------------------------------------------------------------------------------------------------------------------------------------------|
| RQ1               | Area of health   | Papers were deductively categorized as belonging to sexual, reproductive, or transgender health, based on their health outcomes.                                                                                                                                                                                                                                                                                                                                                                                                                                                                                                                                                                                                                                                                                                                      |
|                   | Health outcomes  | Papers were inductively categorized as focusing on one or more of HIV prevention; STI prevention; HIV and STI prevention; HIV management; HIV stigma reduction; Pregnancy prevention; Sexual health (per se); Reproductive health (per se); Gender identity/expression; and Gender affirmation/transition, identified from the title, aim, and/or methods.                                                                                                                                                                                                                                                                                                                                                                                                                                                                                            |
|                   | Healthcare types | Papers were deductively categorized as focusing on one or more of Education/Information, Non-clinical Support, and Clinical Care, identified from the title, aim, and/or methods (intervention/service description). <i>Education/Information</i> refers to services and interventions that impart information only typically to achieve an increase in knowledge (e.g., information about STIs/HIV; contraception; or gender expression and transition). <i>Non-clinical Support</i> refers to services and interventions that provide non-clinical emotional or practical support, beyond information, typically to achieve a desired outcome (e.g., peer communication for HIV stigma reduction; reminders for increased PrEP adherence; or skill building for increased skills for partner notification). <i>Clinical Care</i> refers to services |

|     |                                 |                                                                                                                                                                                                                                                                                                                                                                                                                        |
|-----|---------------------------------|------------------------------------------------------------------------------------------------------------------------------------------------------------------------------------------------------------------------------------------------------------------------------------------------------------------------------------------------------------------------------------------------------------------------|
|     |                                 | and interventions for medical care, specific to testing, diagnosing, treating, and managing sexual and reproductive health issues or gender affirming care (e.g., STI/HIV testing; uptake or maintenance of PrEP; consultations for gender affirming hormones).                                                                                                                                                        |
|     | Online platforms                | Papers were inductively categorized as focussing on one or more type of online platform, using verbatim terms extracted from the title, abstract, aim, and/or methods (service/intervention description).                                                                                                                                                                                                              |
| RQ2 | Target LGBTQI+ youth population | Papers were inductively categorized as targeting young (aged 10-35 years or youth, young LGBTQI+/adult, teen/adolescent) sexual and gender minority and diverse populations, extracted from the title, abstract, aim, and/or eligibility/inclusion criteria.                                                                                                                                                           |
|     | PROGRESS+                       | Papers were deductively categorized as considering Place of Residence, Race/Ethnicity, Occupation, Gender/Sex, Religion, Education, Socio-Economic Status, Social Networks (PROGRESS), Features of relationships, Time-dependent relationships, Sexual identity/orientation, Age, Disability, (+) and Living with HIV in recruitment. Data were extracted from inclusion/eligibility criteria and recruitment methods. |
| RQ3 | Theory                          | Papers were inductively categorized as either having reported or not having reported using a theory, identified from the introduction and/or methods and which theory was used, extracted from the introduction and/or methods.                                                                                                                                                                                        |
|     | How theory was used             | Papers were deductively categorized as having used theory in a manner that is.... Identified from the introduction and/or methods.                                                                                                                                                                                                                                                                                     |

## Quality appraisal

In line with JBI scoping review methodology (53), a quality appraisal was not conducted. This review mapped the literature and did not analyze nor draw conclusions from the outcomes of studies.

## Results

### Study selection

Of an initial 5,200 hits, 3,432 remained after deduplication. The titles and abstracts of 3,432 papers were screened and categorized as 'Excluded' (n=3,194), 'Maybe' (n=138) and 'Potentially Included' (n=100). Full-text screening of the 'Maybe' and 'Included' papers identified 91 papers for inclusion (29–32,43,58–61,64–145).

**Figure 1. PRISMA-ScR flow chart of study inclusion and exclusion process.**

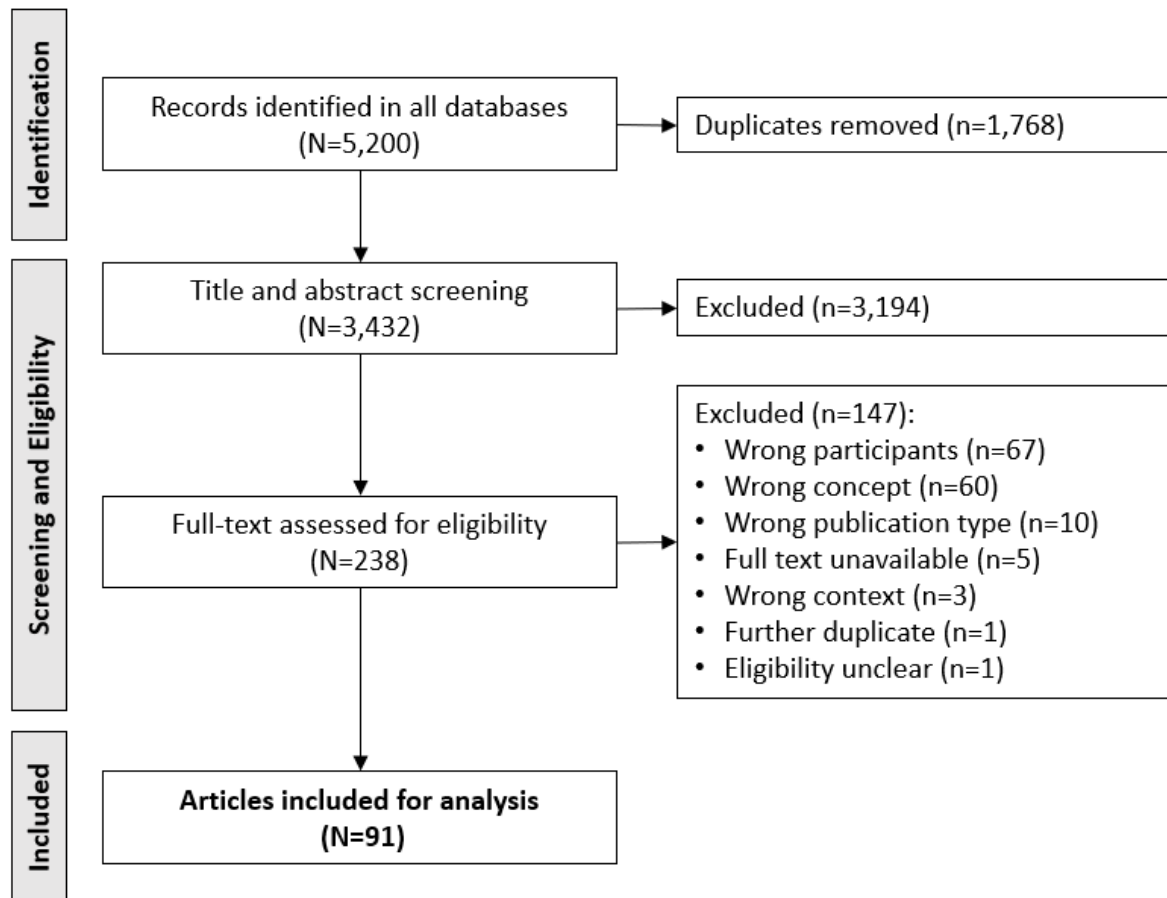

## Study characteristics

Table 2 summarizes the study characteristics of the 91 included papers with citations (for the full dataset, see <https://osf.io/ktwxn>). Regarding date, the majority of papers were published between 2020 to 2022 (63/91, 69%). Only three papers were published in 2023 (up to May). The vast majority of studies were conducted in the USA (82/91), four in Canada, one in Canada and the USA, two in Australia, one in the Republic of Ireland, and one in the UK (England). Concerning study design and research methods, 41/91 were quantitative, of which 23/41 were randomized control trials (RCTs) and 18/41 were non-RCTs or descriptive - most employed surveys with closed questions (37/41) as their method of data collection; 26/91 papers were qualitative, most of which employed interviews (13/26) or focus groups (8/26); and 24/91 papers reported using both qualitative and quantitative methods,

most of which were non-RCTs or descriptive (22/24), largely pairing surveys (21/24) with interviews (11/24) or focus groups (3/24), and/or examining engagement with an intervention, such as number of clicks or length of time spent on it (8/24). Regarding the type of healthcare, the papers either reported on interventions developed for the study (e.g., custom mobile app, novel web app) (62/91) or existing services (e.g., dating apps, government websites) (29/91). Further, most of the papers reported on services or interventions that were real, not hypothetical, meaning the participants could interact with the online platform (84/91), such as ‘the internet’ including websites and social media (e.g., or a mobile app for HIV prevention information and support). A minority were hypothetical (7/91) and sought perspectives on potential services or interventions, such as a mobile app for mentorship regarding HIV prevention. There were 60/91 real interventions, 24/91 real services, 5/91 hypothetical services, and 2/91 hypothetical interventions. Finally, concerning participants, LGBTQI+ youth were participants in most of the papers (82/91); a minority of papers targeted and recruited parents or caregivers (6/91), healthcare providers (4/91), community-based organization staff (1/91) and mentors (1/91) of LGBTQI+ youth. Two papers did not have participants but collected data from existing services for LGBTQI+ youth.

**Table 2. Study characteristics of included papers in the scoping review.**

|                                     | Study characteristics                                                 | n  | (%)  |
|-------------------------------------|-----------------------------------------------------------------------|----|------|
| <b>Publication date</b>             | 2023                                                                  | 3  | 3.3  |
|                                     | 2022                                                                  | 24 | 26.4 |
|                                     | 2021                                                                  | 23 | 25.3 |
|                                     | 2020                                                                  | 16 | 17.6 |
|                                     | 2019                                                                  | 12 | 13.2 |
|                                     | 2018                                                                  | 13 | 14.3 |
| <b>Study design</b>                 | Qualitative                                                           | 26 | 28.6 |
|                                     | Qualitative and Quantitative                                          | 24 | 26.4 |
|                                     | Quantitative                                                          | 41 | 45.1 |
| <b>Data collection <sup>a</sup></b> | Survey(s) with closed questions                                       | 52 | 57.1 |
|                                     | Interviews                                                            | 24 | 26.4 |
|                                     | Routinely collected data analytics/metrics (e.g., time spent on apps) | 13 | 14.3 |
|                                     | Focus groups                                                          | 11 | 12.1 |
|                                     | Survey with closed and open questions                                 | 6  | 6.6  |

|                                       |                                                                |                 |      |
|---------------------------------------|----------------------------------------------------------------|-----------------|------|
|                                       | Biological samples                                             | 6               | 6.6  |
|                                       | Think aloud sessions                                           | 5               | 5.5  |
|                                       | Electronic Health Record content                               | 2               | 1.2  |
|                                       | Forum conversations                                            | 2               | 2.2  |
|                                       | Five-star rating                                               | 2               | 2.2  |
|                                       | Survey with open questions                                     | 2               | 2.2  |
|                                       | 'Qualitative feedback/review' (no detail given)                | 1               | 1.1  |
|                                       | Retroactive chart review                                       | 1               | 1.1  |
|                                       | Experiment (e.g., discrete choice experiment)                  | 1               | 1.1  |
|                                       | Facebook data (e.g., no. of friends)                           | 1               | 1.1  |
|                                       | Workshops                                                      | 1               | 1.1  |
|                                       | Website content                                                | 1               | 1.1  |
|                                       | YouTube video content                                          | 1               | 1.1  |
| <b>Healthcare type</b>                | Intervention (i.e., developed for study, e.g., custom web app) | 62              | 68.1 |
|                                       | Service (i.e., already existing, e.g., dating app)             | 29              | 31.9 |
| <b>Real/Existing or hypothetical</b>  | Real/Existing                                                  | 84              | 92.3 |
|                                       | Hypothetical                                                   | 7               | 7.7  |
| <b>Country study was conducted in</b> | United States of America                                       | 83 <sup>b</sup> | 91.2 |
|                                       | Canada                                                         | 5 <sup>b</sup>  | 5.5  |
|                                       | Australia                                                      | 2               | 2.2  |
|                                       | England                                                        | 1               | 1.1  |
|                                       | Republic of Ireland                                            | 1               | 1.1  |
| <b>Participants<sup>c</sup></b>       | LGBTQI+ youth                                                  | 83              | 91.2 |
|                                       | Parents/Caregivers of LGBTQI+ youth                            | 6               | 6.6  |
|                                       | Healthcare provider working with LGBTQI+ youth                 | 4               | 4.4  |
|                                       | CBO staff working with LGBTQI+ youth                           | 1               | 1.1  |
|                                       | Mentors of LGBTQI+ youth                                       | 1               | 1.1  |

<sup>a</sup>Most studies used multiple data collection methods – all counted here separately.

<sup>b</sup>One study was conducted in Canada and the United States of America – both are counted here separately

<sup>c</sup>Six studies targeted/recruited LGBTQI+ youth and either parents, healthcare provider, community-based organization staff, or mentors of LGBTQI+ youth – all are counted here separately.

## **RQ1: What types of online sexual and reproductive healthcare and transgender healthcare have received attention for LGBTQI+ youth and where are there gaps?**

Table 3 provides an overview of which areas of health and subsequent healthcare types have received attention regarding online healthcare for LGBTQI+ youth. In total, 76/91 papers explored sexual and

reproductive health. The majority of the papers focused on sexual health (71/91, 78%), 3/91 explored reproductive health (3%), and 2/91 explored sexual and reproductive health together (2%). Further, one paper was categorised as exploring and sexual health and transgender health, as it examined use of the internet for both sexual health and transgender health information as well as online technologies for HIV management. However, it is important to note that this paper did not explore integrated SRHC and transgender healthcare. The remaining 15/91 focused on transgender health (17%).

Regarding healthcare types, most of the papers explored provision of or engagement with education/information (72/91) and non-clinical support (56/91). Types of support included peer communication (e.g., forum discussions or social media interactions) (22/56); skill building (e.g., how to use condoms or have conversations about sex) (17/56); medication reminders (e.g., reminders to take PrEP) (13/56); Question and answer (Q&A) with a trained professional or with automated responses (11/56); service locators (e.g., for STI/HIV testing or PrEP) (11/56); personalised recommendations (e.g., tailored HIV testing frequency and PrEP use or strategies for ART adherence) (6/56); counselling (e.g., couples counselling for HIV testing and risk reduction) (3/56); and mentorship for HIV support (1/56) (135). Only 18/91 explored clinical care, most frequently telehealth/medicine (e-consultations with healthcare provider) (12/18) for gender affirming care (8/12) and STI/HIV prevention (4/12), home delivery of STI/HIV self-sample/self-test kits (9/18), home delivery of condoms (3/18), and (hypothetical) home delivery of PrEP (1/18). Table 2 depicts the details of online sexual, reproductive, and transgender healthcare for LGBTQI+ youth.

There were 10 different types of online platforms used across the 91 papers, including 9 papers in which it was unclear (i.e., web-based or eHealth, with no further description) and 1 paper categorized as 'digital technologies'. The most frequently used online platforms were mobile apps (21/91, 23%), websites/web apps (17/91, 19%), telehealth/telemedicine which referred to video calls, typically with

healthcare provider (12/91, 13%), SMS text (9/91, 10%), and social media (7/91, 8%). Figure 2 shows the online platforms used.

Key gaps were research into health outcomes other than STI and BBV prevention, including sexual wellbeing and sexual violence/abuse; clinical care, including partner notification and management; reproductive health, including fertility preservation and assistance; education/information for transgender health, including gender affirming care; and integrated/combined SRHC and transgender healthcare.

**Table 3. Types of online sexual and reproductive healthcare and transgender healthcare explored for LGBTQI+ youth in published literature.**

| Area of health (n)                    | Health outcomes                                                                                                                            | n              | Healthcare type                                                                                                                                                                                                                                                                                                                                                                                            |    |                                                                                                                                                                                                                                                                                                                                                                                                                                                                                                                                  |    |                                                                                                                                                                                                                                                   |    |
|---------------------------------------|--------------------------------------------------------------------------------------------------------------------------------------------|----------------|------------------------------------------------------------------------------------------------------------------------------------------------------------------------------------------------------------------------------------------------------------------------------------------------------------------------------------------------------------------------------------------------------------|----|----------------------------------------------------------------------------------------------------------------------------------------------------------------------------------------------------------------------------------------------------------------------------------------------------------------------------------------------------------------------------------------------------------------------------------------------------------------------------------------------------------------------------------|----|---------------------------------------------------------------------------------------------------------------------------------------------------------------------------------------------------------------------------------------------------|----|
|                                       |                                                                                                                                            |                | Education/ Information e.g.,                                                                                                                                                                                                                                                                                                                                                                               |    | Non-clinical Support e.g.,                                                                                                                                                                                                                                                                                                                                                                                                                                                                                                       |    | Clinical care e.g.,                                                                                                                                                                                                                               |    |
|                                       |                                                                                                                                            |                |                                                                                                                                                                                                                                                                                                                                                                                                            | n  |                                                                                                                                                                                                                                                                                                                                                                                                                                                                                                                                  | n  |                                                                                                                                                                                                                                                   | n  |
| <b>Sexual health (71<sup>a</sup>)</b> | STI and BBV prevention<br><br><i>STIs and BBV (n=21)</i><br><br><i>HIV only (n=25)</i><br><br><i>Human papillomavirus (HPV) only (n=6)</i> | 52             | HIV risk reduction; HIV testing; PrEP; How to have conversations about sex with healthcare provider and partners; HIV disclosure; STIs; STI risk reduction; STI testing; Condom use/ effectiveness; Coping with minority stress; Interpersonal and substance related risk factors; Safe sex; Sex pressures; HPV risk and prevalence; HPV vaccination and effectiveness; HPV vaccination cost and insurance | 42 | Reminders to get tested for HIV/ take PrEP; Q&A with healthcare provider; Personalized HIV risk reduction/ PrEP adherence strategies; PrEP adherence tracking; Feedback on PrEP adherence; Skill development for HIV disclosure; GPS maps for finding STI and HIV test sites; Reminders to get tested for STIs and HIV/ take PrEP; Skill building for condom use; Reminders to get vaccinated for HPV; GPS maps for finding HPV vaccination sites; Links to resources (LGBTQI+ friendly providers); Q&A with healthcare provider | 35 | Home delivery of HIV self-test kits; eConsultation with healthcare provider for PrEP; Home delivery of STI and HIV self-sample kits; Home delivery of condoms; eConsultation with healthcare provider for completing tests; Home delivery of PrEP | 10 |
|                                       | HIV management                                                                                                                             | 9 <sup>a</sup> | AIDS and HIV; Adherence, retention, and self-management; How often to see healthcare provider; ART (names, common side effects, doses per day)                                                                                                                                                                                                                                                             | 7  | Reminders to take ART medication; Feedback on ART adherence; Attention training; Q&A with trained professionals or automated response                                                                                                                                                                                                                                                                                                                                                                                            | 8  |                                                                                                                                                                                                                                                   | 0  |
|                                       | Sexual health <i>per se</i>                                                                                                                | 9 <sup>a</sup> | Sexual health Relationships; Sex; How to access inclusive HIV testing; How to have conversations about sex; Safe sex                                                                                                                                                                                                                                                                                       | 9  | Building skills for having conversations about sex with parents and healthcare provider; Peer communication/ support/ advice regarding sexual health and safe sex                                                                                                                                                                                                                                                                                                                                                                | 4  |                                                                                                                                                                                                                                                   | 0  |
|                                       | HIV stigma reduction                                                                                                                       | 2              | HIV stigma reduction                                                                                                                                                                                                                                                                                                                                                                                       | 1  | Peer discussions for stigma reduction and community building; Q&A with healthcare provider                                                                                                                                                                                                                                                                                                                                                                                                                                       | 2  |                                                                                                                                                                                                                                                   | 0  |
| <b>Reproductive health (3)</b>        | Pregnancy prevention                                                                                                                       | 3              | Sex education; Birth control                                                                                                                                                                                                                                                                                                                                                                               | 2  | Links to resources; Q&A with trained professional; Peer communication/ support                                                                                                                                                                                                                                                                                                                                                                                                                                                   | 2  |                                                                                                                                                                                                                                                   | 0  |



|                                             |                                                     |   |                                                                                                       |    |                                                                              |    |                                                                        |    |
|---------------------------------------------|-----------------------------------------------------|---|-------------------------------------------------------------------------------------------------------|----|------------------------------------------------------------------------------|----|------------------------------------------------------------------------|----|
|                                             | Reproductive care for cancer survivors              | 1 | Providing reproductive care for adolescent and young adult LGBTQ cancer survivors                     | 1  |                                                                              | 0  |                                                                        | 0  |
| <b>Sexual and reproductive health (2)</b>   | Sexual health and reproductive health <i>per se</i> | 1 | Sexual health; Sex education; Birth control, IUD, implant, the pill; Human Papilloma Virus prevention | 2  |                                                                              | 0  |                                                                        | 0  |
| <b>Transgender health (16 <sup>a</sup>)</b> | Gender identity/transition <i>per se</i>            | 8 | Trans people's experiences; Gender affirming language                                                 | 7  | Peer support and communication; Coping skills for stigma; Links to resources | 5  |                                                                        | 0  |
|                                             | Gender affirming care (8)                           | 8 | Gender affirming care                                                                                 | 1  |                                                                              | 0  | eConsultation with healthcare provider for hormone replacement therapy | 8  |
| <b>Total</b>                                |                                                     |   |                                                                                                       | 72 |                                                                              | 56 |                                                                        | 18 |

<sup>a</sup>Numbers within 'Area of health' equal 92 instead of 91 as one paper was categorized as sexual health and transgender health separately. Further, Numbers within 'Health outcomes' equal 93 instead of 91 as the same paper was subsequently categorized as both HIV management and sexual health *per se* separately within sexual health and gender identity/transition *per se* within transgender health.

<sup>b</sup>The majority of studies explored information/education, support, and/or clinical care, thus studies have been counted multiple times cross these three columns.

Figure 2. Online platforms used in sexual, reproductive, and transgender healthcare for LGBTIQ+ youth.

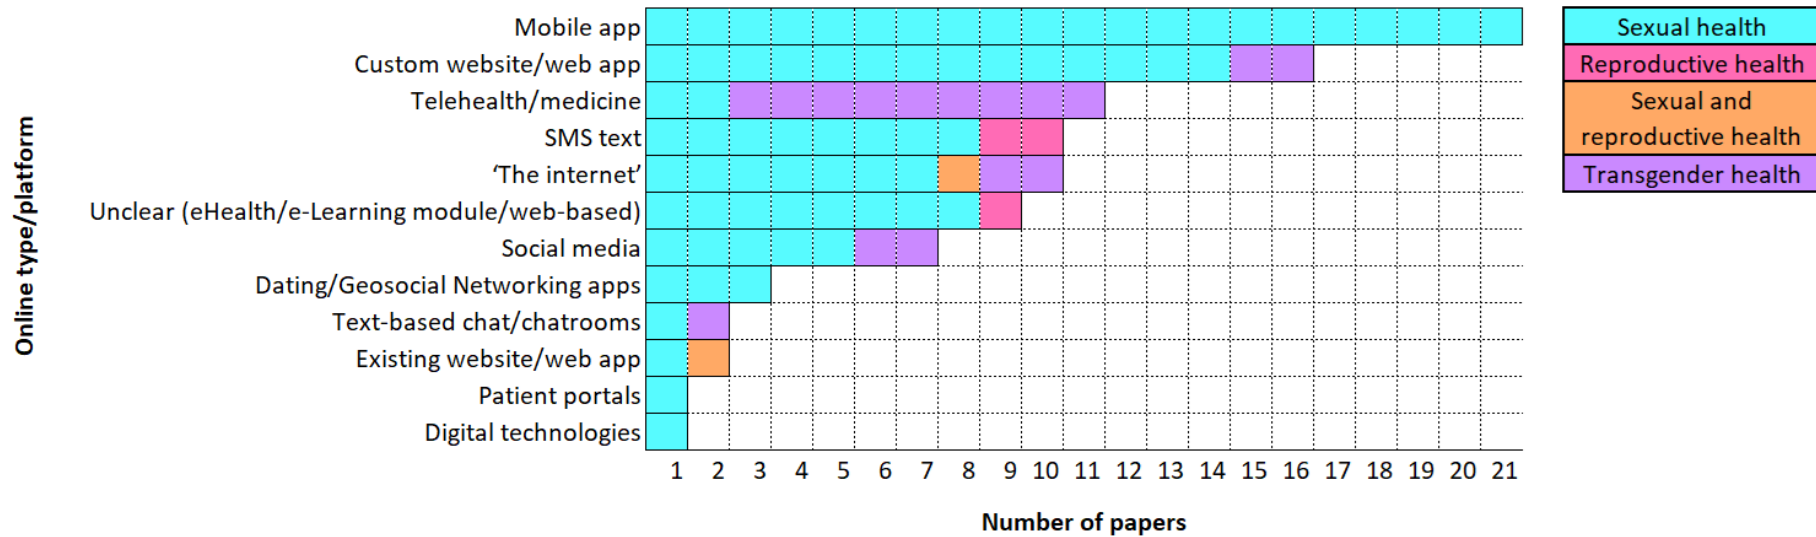

<sup>a</sup>Numbers equal 93 instead of 91 as one paper was classified as 'the internet' for both sexual health and transgender health separately, and one paper was categorised as both custom website and SMS text.

## **RQ2: Who are the target LGBTQI+ youth populations of online sexual and reproductive healthcare and transgender healthcare research, what additional intersectional factors have been considered, and where are there gaps?**

The most frequently targeted LGBTQI+ population were GBMSM (62/91, 68%) (exclusively for sexual health), of which 26/62 were specific to cisgender men and 19/62 specified ‘assigned male at birth’ but were inclusive of people who identified as a different gender (e.g., non-binary) - 30/62 did not specify sex assigned at birth or gender identity (i.e., “gay men”). 27/91 papers targeted trans and gender diverse youth, almost half of which were for transgender health (14/27) or sexual health (HIV prevention) for trans women (9/28). 6/91 papers broadly targeted lesbian, gay, and bisexual (LGB or sexual minority) youth (1/6) or LGBT+ (sexual and gender minority) youth (5/6). Very few papers targeted sexual minority women (4/91), of which 2/4 were specific to cisgender women for reproductive health (pregnancy prevention); 1/4 specified gender inclusive ‘assigned female at birth’ and 1/4 was inclusive of people who identify as a woman, both of which were for sexual health. Tables 3 shows the LGBTQI+ youth populations targeted in online SRHC and transgender healthcare research by areas of health and health outcomes.

Across the 91 papers, targeted LGBTQI+ youth ranged in age from 7-36 years with 39 age ranges, the most common of which were 18-30 (9/91), 14-18 (7/91), 18-25 (6/91), 13-19 (5/91), 16-24 (5/91) and 18-24 (5/91) years. Almost half (41%) of youth targeted were aged 18 or older. Eight papers did not report a target age range nor age range of the participants. Figure 3 depicts target age ranges of LGBTQI+ youth targeted for online SRHC and transgender healthcare research.

Regarding intersectionality, in line with the remit of the current scoping review (i.e., 'LGBTQI+ youth'), the most commonly identified PROGRESS+ variables were 'Age', considered in all of the papers, followed by 'Gender/Sex' (89/91), and 'Sexual orientation/identity/behaviour' (73/91). Other PROGRESS+ variables were Race/Ethnicity (25/91) for sexual healthcare (22/25), reproductive healthcare (1/25), sexual and reproductive health (1/25), and transgender healthcare (1/25); Place of Residence (5/91), Features of Relationships (5/91), Disability (1/91), and Social Networks (1/91), all for sexual health; Education (2/91) for reproductive health; and Living with HIV (10/91) largely for sexual health (HIV management). No papers considered Religion, Occupation, Socio-economic Status (i.e., income), or Time-dependent relationships in inclusion criteria for recruitment. Table 4 shows PROGRESS+ criterion considered in recruitment of target LGBTQI+ youth for online SRHC and transgender healthcare by healthcare dimensions and health outcomes.

Key gaps were research into online SRHC for populations other than GBMSM, in particular young sexual minority women and trans and gender diverse youth; and consideration of demographics and characteristics associated with inequalities in health, such as Place of Residence, Occupation, Religion, Education, and Socio-Economic Status.

**Figure 3. Target age ranges of LGBTQ+ youth for online sexual and reproductive healthcare and transgender healthcare.**

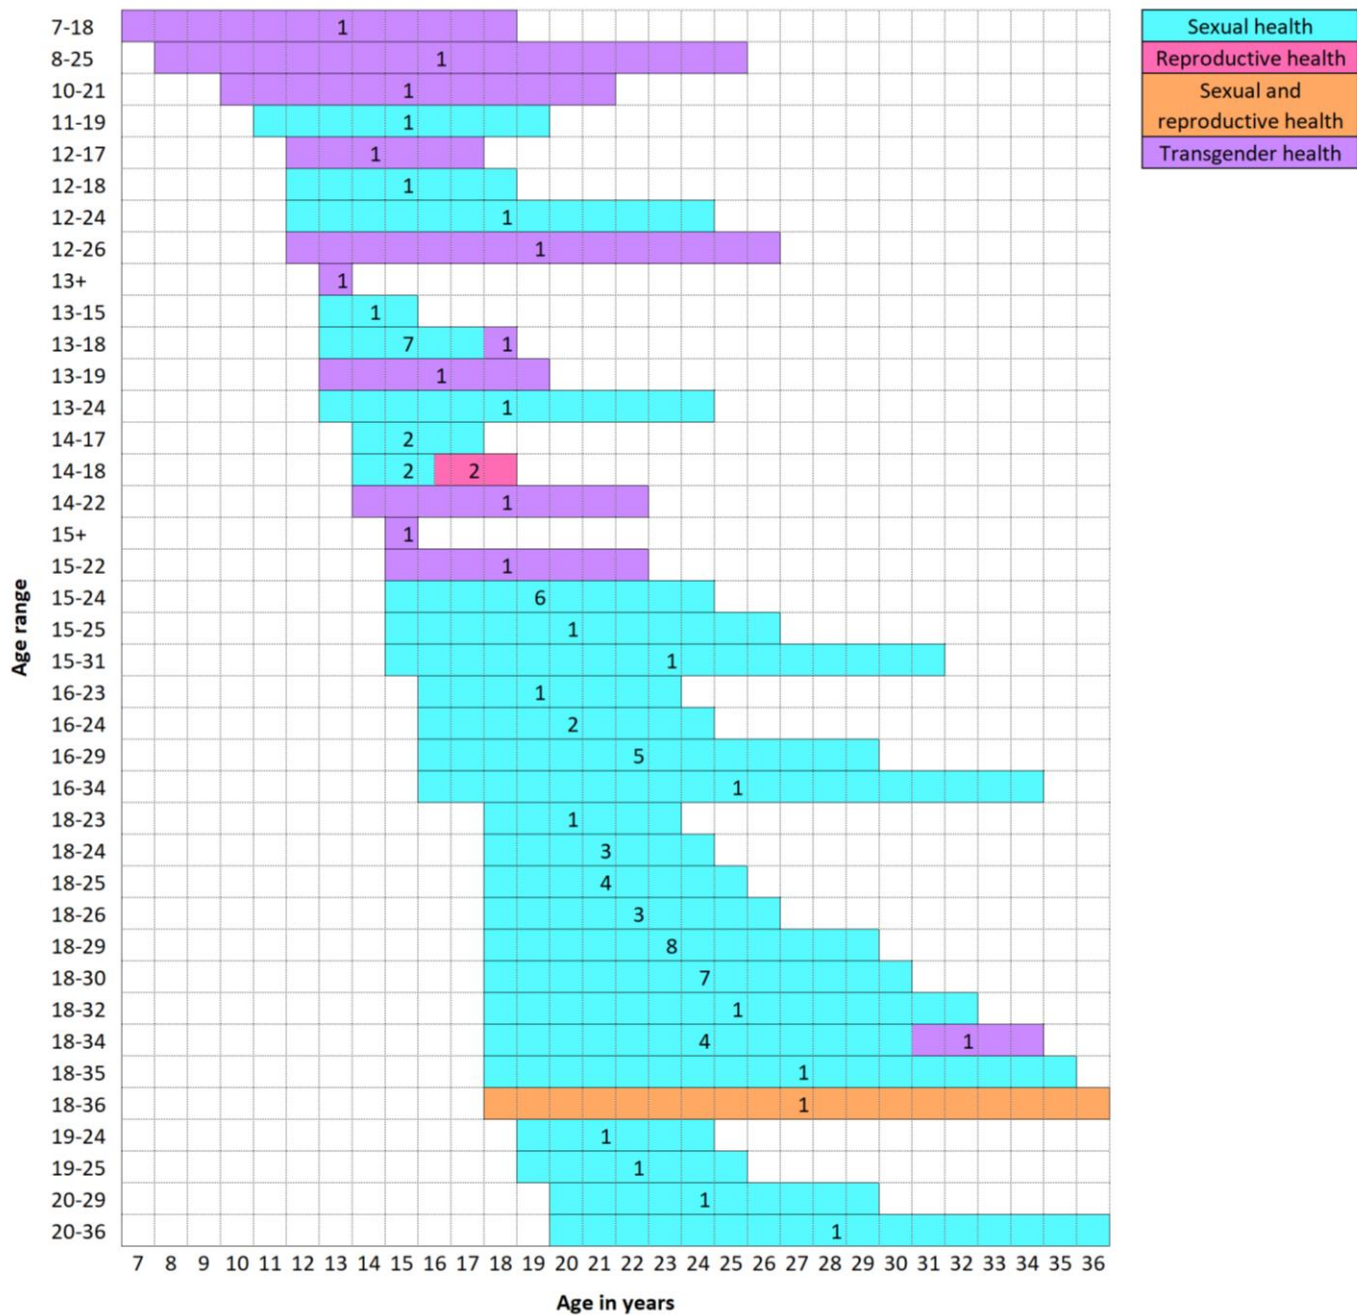

<sup>a</sup>Numbers within the bars represent the number of studies that the age range(s) appeared in (e.g., the age range 18-29 was used in 8 studies).

<sup>b</sup>The total number of studies do not add up to 100% due to non-reporting.

**Table 4. Target LGBTQI+ youth populations for online sexual and reproductive healthcare and transgender healthcare.**

| Area of health (n)                         | Health outcome (n)                                        | Target lesbian, gay, bisexual, queer/questioning, intersex, and other sexual and gender minorities (LGBTQI+) population (n) |                                                     |                                                         |                      |                                                             |                                                      |                                |               |                      |                                      |                                                                                          |                                                   |
|--------------------------------------------|-----------------------------------------------------------|-----------------------------------------------------------------------------------------------------------------------------|-----------------------------------------------------|---------------------------------------------------------|----------------------|-------------------------------------------------------------|------------------------------------------------------|--------------------------------|---------------|----------------------|--------------------------------------|------------------------------------------------------------------------------------------|---------------------------------------------------|
|                                            |                                                           | LGBTQI+/<br>Sexual<br>and<br>gender<br>minority                                                                             | Lesbian,<br>Gay,<br>Bisexual/<br>Sexual<br>minority | GBMSM <sup>b</sup><br>(sex/<br>gender not<br>specified) | GBMSM<br>(cisgender) | GBMSM<br>(gender<br>inclusive<br>assigned<br>male at birth) | GBMSM and<br>trans women<br>who have sex<br>with men | Trans and<br>gender<br>diverse | Trans<br>masc | Trans<br>women       | Sexual<br>minority<br>women<br>(cis) | Sexual minority<br>assigned female<br>at birth<br>(gender inclusive<br>e.g., non-binary) | Sexual<br>minority<br>women<br>(sex<br>inclusive) |
| <b>Sexual health (71)<sup>a</sup></b>      | STI and BBV prevention (21)                               | -                                                                                                                           | -                                                   | 6                                                       | 9                    | 5                                                           | -                                                    | -                              | 1             | -                    | -                                    | -                                                                                        | -                                                 |
|                                            | HIV only prevention (25)                                  | -                                                                                                                           | -                                                   | 8                                                       | 5                    | 6                                                           | 4                                                    | 1                              | -             | 1                    | -                                    | -                                                                                        | -                                                 |
|                                            | HPV only prevention (n=6)                                 | -                                                                                                                           | -                                                   | 4                                                       | 2                    | -                                                           | -                                                    | -                              | -             | -                    | -                                    | -                                                                                        | -                                                 |
|                                            | HIV management (9) <sup>a</sup>                           | -                                                                                                                           | -                                                   | 4                                                       | -                    | 1                                                           | 3                                                    | -                              | -             | 1 <sup>a</sup>       | -                                    | -                                                                                        | -                                                 |
|                                            | SH <i>per se</i> (n=9) <sup>a</sup>                       | 1                                                                                                                           | 1                                                   | 1                                                       | 1                    | 1                                                           | -                                                    | 2                              | -             | 1 <sup>a</sup>       | -                                    | -                                                                                        | 1                                                 |
|                                            | HIV stigma reduction (2)                                  | -                                                                                                                           | -                                                   | -                                                       | -                    | 2                                                           | -                                                    | -                              | -             | -                    | -                                    | -                                                                                        | -                                                 |
| <b>Reproductive health (3)</b>             | Pregnancy prevention (2)                                  | -                                                                                                                           | -                                                   | -                                                       | -                    | -                                                           | -                                                    | -                              | -             | -                    | 2                                    | -                                                                                        | -                                                 |
|                                            | Reproductive care for cancer survivors (1)                | 1                                                                                                                           | -                                                   | -                                                       | -                    | -                                                           | -                                                    | -                              | -             | -                    | -                                    | -                                                                                        | -                                                 |
| <b>Sexual and reproductive health (2)</b>  | Sexual and reproductive health <i>per se</i> (2)          | 1                                                                                                                           | -                                                   | -                                                       | -                    | -                                                           | -                                                    | -                              | -             | -                    | -                                    | 1                                                                                        | -                                                 |
| <b>Transgender health (16)<sup>a</sup></b> | Gender identity/transition <i>per se</i> (8) <sup>a</sup> | 2                                                                                                                           | -                                                   | -                                                       | -                    | -                                                           | -                                                    | 5                              | -             | 1 <sup>a</sup>       | -                                    | -                                                                                        | -                                                 |
|                                            | Gender affirming care (8)                                 | -                                                                                                                           | -                                                   | -                                                       | -                    | -                                                           | -                                                    | 8                              | -             | -                    | -                                    | -                                                                                        | -                                                 |
| <b>Total</b>                               |                                                           | <b>5</b>                                                                                                                    | <b>1</b>                                            | <b>23</b>                                               | <b>17</b>            | <b>15</b>                                                   | <b>7</b>                                             | <b>17</b>                      | <b>1</b>      | <b>2<sup>a</sup></b> | <b>2</b>                             | <b>1</b>                                                                                 | <b>1</b>                                          |

<sup>a</sup>Numbers within the cells equal 93 instead of 91 as one paper (115) (targeting trans women) was classified as both sexual health and trans health separately, and subsequently, HIV management and sexual health *per se* within sexual health and gender identity/transition *per se* within trans health. Thus, one paper targeting trans women is represented three times, however, this is not reflected in the total number of trans women, where the paper is only counted once.

<sup>b</sup>Gay, bisexual, and other men who have sex with men

**Table 5. Intersectional factors considered in target LGBTQI+ youth populations for online sexual and reproductive healthcare and transgender healthcare.**

| Area of health (n)                         | Health outcome (n)                               | PROGRESS+ variables considered when targeting LGBTQI+ youth for online sexual and reproductive healthcare and transgender healthcare |                |            |                |          |           |                                |                |                           |                       |                                       |            |                 |
|--------------------------------------------|--------------------------------------------------|--------------------------------------------------------------------------------------------------------------------------------------|----------------|------------|----------------|----------|-----------|--------------------------------|----------------|---------------------------|-----------------------|---------------------------------------|------------|-----------------|
|                                            |                                                  | Place of residence                                                                                                                   | Race/Ethnicity | Occupation | Gender/Sex     | Religion | Education | Socio-economic status (income) | Social network | Features of relationships | Age                   | Sexual orientation/identity/behaviour | Disability | Living with HIV |
| <b>Sexual health (71)<sup>a</sup></b>      | STI and BBV prevention (21)                      | 3                                                                                                                                    | 5              | -          | 21             | -        | -         | -                              | -              | 3                         | 21                    | 21                                    | -          | -               |
|                                            | HIV only prevention (25)                         | 1                                                                                                                                    | 11             | -          | 23             | -        | -         | -                              | 1              | 2                         | 25                    | 24                                    | -          | -               |
|                                            | HPV only prevention (6)                          | -                                                                                                                                    | -              | -          | 6              | -        | -         | -                              | -              | -                         | 6                     | 6                                     | -          | -               |
|                                            | HIV management (9) <sup>a</sup>                  | 1                                                                                                                                    | 3              | -          | 9              | -        | -         | -                              | -              | -                         | 9 <sup>a</sup>        | 8                                     | 1          | 9 <sup>a</sup>  |
|                                            | SH <i>per se</i> (9) <sup>a</sup>                | -                                                                                                                                    | 1              | -          | 8 <sup>a</sup> | -        | -         | -                              | -              | -                         | 9 <sup>a</sup>        | 6                                     | -          | 1 <sup>a</sup>  |
|                                            | HIV stigma reduction (2)                         | -                                                                                                                                    | 2              | -          | 2              | -        | -         | -                              | -              | -                         | 2                     | 2                                     | -          | -               |
| <b>Reproductive health (3)</b>             | Pregnancy prevention (2)                         | -                                                                                                                                    | 1              | -          | 2              | -        | 2         | -                              | -              | -                         | 2                     | 2                                     | -          | -               |
|                                            | Reproductive care for cancer survivors (1)       | -                                                                                                                                    | -              | -          | 1              | -        | -         | -                              | -              | -                         | 1                     | 1                                     | -          | -               |
| <b>Sexual and reproductive health (2)</b>  | Sexual and reproductive health <i>per se</i> (2) | -                                                                                                                                    | 1              | -          | 2              | -        | -         | -                              | -              | -                         | 2                     | 2                                     | -          | -               |
| <b>Transgender health (16)<sup>a</sup></b> | Gender identity/transition <i>per se</i> (7)     | -                                                                                                                                    | 1              | -          | 8 <sup>a</sup> | -        | -         | -                              | -              | -                         | 8 <sup>a</sup>        | 2                                     | -          | 1 <sup>a</sup>  |
|                                            | Gender affirming care (8)                        | -                                                                                                                                    | -              | -          | 8              | -        | -         | -                              | -              | -                         | 8                     | -                                     | -          | -               |
| <b>Total</b>                               |                                                  | <b>5</b>                                                                                                                             | <b>25</b>      | <b>0</b>   | <b>89</b>      | <b>0</b> | <b>2</b>  | <b>0</b>                       | <b>1</b>       | <b>5</b>                  | <b>91<sup>a</sup></b> | <b>74</b>                             | <b>1</b>   | <b>10</b>       |

<sup>a</sup>One paper was categorized as both sexual health and trans health separately, and subsequently HIV management and sexual health *per se*. Thus, one paper represented three times within the Gender/Sex column and the Age column. This is not reflected in the total numbers for these columns, where the paper is only counted once.

### **RQ3: How, if at all, have theories, models, and frameworks have been used in research into online sexual and reproductive healthcare and transgender healthcare for LGBTQI+ youth?**

Of the 91 included papers, 54/91 reported use of at least one framework, across which 44 frameworks were identified (see Table 6 for an overview by areas of health). Most papers reported only one framework 39/54; 15/54 papers reported more than one framework (two frameworks, 10/16; three frameworks, 3/16; four frameworks, 1/16; five frameworks, 1/16). Two of the 54 papers reported having used a framework without specifying which it was. A small number of papers reported using frameworks to provide a contextual lens for understanding how social structures influence people's experiences (7/54) (e.g., Critical Race Theory or Intersectionality; (129)). Most of the studies reported using a framework(s) in an applied manner, for example, for development of study materials or intervention content, or to guide analyses or evaluation (50/54). However, 20/50 of these reported their study, intervention, or analysis to be 'theory-driven' (e.g., 76,113,120) or 'informed by' (e.g., (131,141), or having used a framework(s) to 'guide the project' or 'for an in-depth exploration' with no clear replicable explanation of how this was done – not including studies that specified this detail was published elsewhere. A key gap here is clear reporting of how theories are used.



**Table 6. The theories, models, and frameworks, henceforth framework(s), used in online sexual and reproductive healthcare and transgender healthcare for LGBTQI+ youth.**

| Health dimension (n)                      | Grouping (n)                   | Theory/Framework/Model                              | n  | How Theory/Framework/Model have been used in studies (n) |         |         |
|-------------------------------------------|--------------------------------|-----------------------------------------------------|----|----------------------------------------------------------|---------|---------|
|                                           |                                |                                                     |    | Theoretical                                              | Applied | Unclear |
| <b>Sexual health (43)</b>                 | Communication (1)              | Narrative Communication/Storytelling                | 1  | -                                                        | 1       | -       |
|                                           | Education/ Learning (2)        | Dual Coding Theory                                  | 1  | -                                                        | 1       | 1       |
|                                           |                                | Entertainment Education                             | 1  | -                                                        | 1       | -       |
|                                           |                                | Cognitive Theory of Multimedia Learning             | 1  | -                                                        | 1       | 1       |
|                                           | Healthcare (2)                 | Chronic Care Model                                  | 1  | -                                                        | 1       | 1       |
|                                           |                                | Patient-Centered Medical Home Model                 | 1  | -                                                        | 1       | 1       |
|                                           | Implementation (2)             | Intervention Mapping                                | 1  | -                                                        | 1       | -       |
|                                           |                                | The RE-AIM Model                                    | 1  | -                                                        | 1       | 1       |
|                                           | Mental Health (3)              | Minority Stress Model                               | 1  | -                                                        | 1       | 1       |
|                                           |                                | Resilience Framework                                | 1  | -                                                        | 1       | -       |
|                                           |                                | Stigma Theory                                       | 1  | -                                                        | 1       | -       |
|                                           | Social/Cognition (39)          | Contingency Management                              | 1  | -                                                        | 1       | -       |
|                                           |                                | Dual Process Theory                                 | 1  | -                                                        | 1       | -       |
|                                           |                                | Erdelez Model of Information Encountering           | 1  | -                                                        | 1       | -       |
|                                           |                                | Information-Motivation-Behaviour Skills Model       | 11 | -                                                        | 11      | 3       |
|                                           |                                | Integrated Behavioural Model                        | 1  | -                                                        | 1       | -       |
|                                           |                                | Kari Conceptualization of Information Use           | 1  | -                                                        | 1       | -       |
|                                           |                                | Social-Cognitive Theory                             | 9  | -                                                        | 9       | 2       |
|                                           |                                | Social Norms Theory                                 | 1  | -                                                        | 1       | -       |
|                                           |                                | Social-Personal (Theoretical) Framework             | 2  | -                                                        | 2       | 2       |
|                                           |                                | The Fogg Behavioural Model of Persuasive Technology | 1  | -                                                        | 1       | -       |
|                                           |                                | The Implementation Intention Theory                 | 1  | -                                                        | 1       | -       |
|                                           |                                | The Protection Motivation Theory                    | 3  | -                                                        | 3       | 3       |
|                                           |                                | The Theory of Planned Behaviour                     | 3  | -                                                        | 3       | -       |
|                                           |                                | The Theory of Normative Social Behaviour            | 1  | -                                                        | 1       | -       |
|                                           |                                | The Transtheoretical Model                          | 1  | -                                                        | 1       | -       |
| The Wilson Model of Information Behaviour | 1                              | -                                                   | 1  | -                                                        |         |         |
| Social Identity (1)                       | Social Identity Theory         | 1                                                   | -  | 1                                                        | -       |         |
| Social/Structural (6)                     | Empowerment (Education) Theory | 2                                                   | -  | 2                                                        | 1       |         |

|                                           |                         |                                                              |   |   |   |   |
|-------------------------------------------|-------------------------|--------------------------------------------------------------|---|---|---|---|
|                                           |                         | Gidden's Structuration Theory                                | 1 | 1 | 1 | - |
|                                           |                         | Intersectionality                                            | 1 | - | 1 | 1 |
|                                           |                         | The Pharmacopornographisation Framework                      | 1 | 1 | - | - |
|                                           |                         | The Social Ecological Model                                  | 1 | - | 1 | 1 |
|                                           | Technology (3)          | Information System Success Model                             | 1 | - | 1 | - |
|                                           |                         | The Health Information Technology Usability Evaluation Model | 1 | - | 1 | - |
|                                           |                         | The Unified Theory of Acceptance and Use of Technology Model | 1 | - | 1 | - |
|                                           | Unknown (2)             | Not reported                                                 | 2 | - | 2 | 2 |
| <b>Reproductive health (3)</b>            | Social/Cognition (1)    | Information-Motivation-Behaviour Skills Model                | 2 | - | 2 | - |
|                                           | Social/Structural (2)   | Critical Race Theory                                         | 1 | 1 | - | - |
|                                           |                         | Intersectionality                                            | 1 | 1 | - | - |
| <b>Transgender health (7)</b>             | Education/ Learning (2) | Gagne's '9 External Events of Instruction'                   | 1 | - | 1 | - |
|                                           |                         | Constructive Alignment Model                                 | 1 | - | 1 | - |
|                                           | Healthcare (1)          | The Iowa Model of Evidence-Based Practice                    | 1 | - | 1 | 1 |
|                                           | Implementation (1)      | The RE-AIM Model                                             | 1 | - | 1 | 1 |
|                                           | Mental Health (5)       | Interpersonal Theory of Suicide                              | 1 | 1 | 1 | 1 |
|                                           |                         | Minority Stress Model                                        | 3 | 3 | 2 | 1 |
|                                           |                         | Transactional Model of Stress and Coping                     | 1 | 1 | - | 1 |
|                                           | Social/Structural (2)   | Intersectionality                                            | 1 | 1 | 1 | 1 |
|                                           |                         | Transgender Studies                                          | 1 | - | 1 | 1 |
| <b>Sexual and reproductive health (1)</b> | Social/Structural (1)   | The Structural Influence Model of Health Communication       | 1 | 1 | - | - |

<sup>a</sup>Numbers do not add up to 100% as many studies used more than one framework.

## Discussion

### Principal results

The objective of this scoping review was to identify and describe existing literature on online SRHC and transgender healthcare for LGBTQI+ youth, synthesize study findings, and make recommendations for future research. This paper is the first to map a high volume of studies within online SRHC and transgender healthcare for LGBTQI+. The key findings were that most of the research was for sexual health, particularly HIV and STI prevention and HIV management. The majority of this research centered around the provision of or engagement with information/education and non-clinical support (e.g., reminders to get tested for HIV) and targeted young GBMSM aged 16 or 18 years and over (up to 36 years). There was little research into clinical care for sexual health (e.g., home delivery of STI/HIV testing kits, condoms, or PrEP). Additionally, there was very little research into reproductive health, with only two papers focusing solely on pregnancy prevention, two on general sexual and reproductive health, and one on the delivery of inclusive reproductive care for cancer survivors. Further, for transgender healthcare, half of the research focused on information/education and non-clinical support (e.g., peer communication/support) and the other half centered around telehealth/medicine (i.e., eConsultations) with healthcare provider regarding gender affirming care. The vast majority of this research targeted trans and gender diverse youth between ages 7 and 26. Moreover, there were a wide range of online platforms explored in researched, most of which were developed for a novel intervention including mobile apps, websites/web apps, and some of which were existing services such as websites, social media, and GSN/dating apps. Also, most research did not consider socio-economic demographics associated with inequalities in health (e.g., race/ethnicity, place of residence, occupation, and education (22,23) in the targeting of digital healthcare for LGBTQI+ youth. Finally, most papers used at least one theory or framework, indicating that the majority of interventions developed for online SRHC for LGBTQI+ youth are theory based.

## **Comparison of key gaps in the literature with prior work and recommendations for future research**

This scoping review demonstrates that there are key gaps in the literature. First is the dearth of research into online SRHC and transgender healthcare for LGBTQI+ youth outside the USA, particularly UK and Ireland. This is an important gap in research as financial cost is an often-reported barrier to SRHC and gender affirming care in the USA (146), given that their healthcare system is significantly more expensive than other countries (147), whereas, this is not a key issue in the UK due to the National Health Service providing healthcare free at the point of use, funded by public taxes (148). Therefore, conclusions drawn from studies regarding acceptability and barriers to online SRHC and gender affirming care for LGBTQI+ from USA may not be entirely applicable to the UK. Future research is needed to fill this gap and conduct research regarding online SRHC and transgender healthcare for LGBTQI+ outside the USA.

Another gap is research into health outcomes other than STI and BBV prevention, including sexual wellbeing and sexual violence/abuse. While these may fall under sexual health (149–151), neither were specified in any of the sexual healthcare papers included in this study. Further, these aspects of sexual health may be accessed by LGBTQI+ on online platforms designed for the general public, rather than LGBTQI+ youth (e.g., 28,150). However, research has shown that LGBTQI+ youth can struggle to identify relevant information and legitimate sources of information online (28,152). Moreover, despite sexual health, particularly STI and BBV prevention being the most researched, there was no literature regarding online options for partner notification and management which is problematic, as this is vital for reducing the spread of STIs (153).

A further gap was research into reproductive healthcare. The little research into online reproductive care largely focused on pregnancy prevention exclusively targeting cisgender sexual minority women

yet LGBTQI+ youth, including but not limited to sexual minority women, are among the highest at risk for early and unplanned pregnancy (1,154,155). Additionally, LGBTQI+ youth may require fertility preservation or assistance (2,156–158) yet there was no research into this. Future research should explore the delivery and engagement with online healthcare for more expansive reproductive and fertility issues for LGBTQI+ youth.

Additionally, a critical gap was the lack of studies exploring education/information regarding gender affirming care for trans youth. The one study that explored this provided no detail about what the education provided via virtual visits entailed (60). This is an important finding as the internet, particularly social media, is a common and popular source of information of transgender healthcare for trans and gender diverse youth (159) yet they are lacking in official resources about transgender healthcare that have been rigorously developed. This also means that there is a lack of empirical research into how LGBTQI+ youth are engaging with information about gender affirming care. Future research should consider development of formal educational resources for LGBTQI+ about gender affirming care.

Another gap is research into integrated/combined SRHC and transgender healthcare. This is of particular importance as SRHC integrated with transgender healthcare can facilitate access to both (50,51) and online care can overcome key barriers to SRHC and gender affirming care, delivering increased accessibility, convenience, and privacy (60,86,132,136,139). Together, this indicates that the provision of integrated SRHC and transgender healthcare has the potential to increase uptake of SRHC and improve sexual and reproductive health outcomes among trans youth. Yet, no studies have explored this. Future research should investigate the acceptability and feasibility of integrated care for LGBTQI+ youth.

A further vital gap is research into online sexual healthcare for populations other than GBMSM. While GBMSM have a disproportionately high burden of STIs/BBV (6), TDG youth and bisexual girls/women are also at high risk (1) and are considerably under-researched for digital innovations within sexual health prevention and management. Moreover, we found that socio-economic demographics and characteristics associated with inequalities in health (e.g., Place of Residence, Race/Ethnicity, Occupation, Religion, Education, Socio-Economic Status) (22,23) are largely overlooked when developing targeted digital SRHC interventions for LGBTQI+ youth. This is problematic as such demographics can impact access to online technology and the internet (160) and risk of poorer sexual and reproductive health outcomes (161–163). Future research should consider generating target sampling frames using the PROGRESS+ framework for purposeful recruitment of diverse populations.

Finally, there is an important gap regarding the reporting of the use of theory. As theory-based interventions support understanding of behaviour and behaviour change and have a higher likelihood of success, it is important that interventions are both theory and evidence based (164). While almost half of the papers in this scoping review reported applying a theory to the development of interventions (see Table 6), many of these did not report how this was done; they reported that the intervention was ‘theory-based’, for example, with no further explanation of what this entailed. Many papers did report use of theory to a high and replicable standard (e.g., 68,117,121). Future research could use these papers as an example of reporting the use of theory.

## **Strengths**

First, the volume of included papers in this scoping review provided a comprehensive overview of the literature into SRHC and transgender healthcare, depicting the breadth of research and identifying clear gaps (165). Further, following the JBI methodology (54) and using nine databases (166) for the search ensured that this scoping review was conducted in a rigorous and systematic manner and

facilitated a thorough identification and mapping of the literature into online SRHC and transgender healthcare for LGBTQI+ youth, represented by the volume of studies. Another strength of the study was the contribution of two reviewers to screening both titles/abstracts and full texts. This reduced the chance of bias (167) and ensured that the eligibility criteria were well understood, and methods replicable, by a researcher outside the field of sexual health.

## Limitations

The volume of papers in this study classified it as a large scoping review and limited the detail that could be explored and cross paper analyses that could be conducted (165), such as thematic analysis to identify barriers and facilitators, due to the variety in participants and concepts (see S2 Appendix). Another limitation of this study may be that only ten papers' titles, abstracts, and key words were used to specify search terms. However, no guidance on how many papers to include for identifying search terms is provided by JBI (53). Additionally, due to the volume of included papers, the reference lists of included papers were not searched. Therefore, while the authors' best efforts were made to ensure that all possibly relevant studies were included in this scoping review, some papers may have been missed.

## Conclusions

While there is a wide range of research into online SRHC and trans healthcare, the majority of the existing research for SRHC focusses on the perspectives of young GBMSM pertaining to HIV and STI prevention and centers around the provision or engagement with education or information and non-clinical support, such as reminders to get tested or to take anti-retroviral medication. There are critical gaps in the literature including research focusing on reproductive healthcare, the provision of clinical care, and the perspectives of other LGBTQI+ sub-populations such as trans and gender diverse youth

and young sexual minority women and women who have sex with women. Further, intersectional demographics and characteristics associated with inequalities in health such as education, occupation, income, religion, are chronically under-considered in recruitment. The PROGRESS+ framework could be a useful tool for targeted recruitment of diverse populations. Given that there is a shift to the delivery of healthcare online and LGBTQI+ youth have disproportionately poor sexual health outcomes and low engagement with SRHC, it is vital that these research gaps are filled to ensure that LGBTQI+ are considered and included in the development and delivery of online healthcare.

## Abbreviations, Acronyms, and Initials

GBMSM: Gay, bisexual, and other men who have sex with men

HIV: Human immunodeficiency virus

HPV: Human papillomavirus

LGBTQI+: Lesbian, gay, bisexual, transgender, queer, questioning, intersex, and other sexual orientation and gender diverse and minority populations

PCC: Participants, Concept, and Context

PrEP: Pre-exposure prophylaxis

SRHC: Sexual and reproductive healthcare

STI: Sexually transmitted infection

Trans: Transgender and gender diverse

UK: United Kingdom

UN: United Nations

USA: United States of America

WHO: World Health Organisation

## Acknowledgements

We would like to acknowledge the contribution of Ron O’Kane (RO), a PhD student at GCU, for acting as the second reviewer. We would also like to acknowledge Ruth Leiser, a Research Associate at the University of Strathclyde, for peer reviewing this scoping review.

## Funding

This scoping review was funded by a GCU PhD scholarship awarded to the first author (JMCL), who is a member of the Sexual Health and Blood Borne Viruses (SHBBV) research group and the Research Centre for Health (ReaCH). Supervisors for the PhD, JMacD and CSE, are supported by GCU. PF, based at the University of Strathclyde, and JG, based at University College London, are supported by their host institutions, as supervisors of the PhD.



## S1 Appendix

### S1 Appendix: Glossary of terms used within this paper, their definitions, and references.

| Term                                       | Definition                                                                                                                                                                                                                                                                                                                       |
|--------------------------------------------|----------------------------------------------------------------------------------------------------------------------------------------------------------------------------------------------------------------------------------------------------------------------------------------------------------------------------------|
| Cisgender                                  | Those whose gender identity aligns with their sex assigned at birth (168,169).                                                                                                                                                                                                                                                   |
| Gender                                     | The socially constructed, not biologically determined, norms and roles associated with masculinity and femininity (e.g., wearing specific clothes) (39).                                                                                                                                                                         |
| Gender affirmation                         | A social/appearance and/or physical/medical transition to align one's gender expression and body with their gender identity (39,170).                                                                                                                                                                                            |
| Gender affirming care                      | Clinical care to treat gender dysphoria and/or support people in living in the gender that is most authentic and comfortable to them (e.g., mental health assessments; puberty blockers; menstrual suppression; hormone replacement therapy; fertility preservation or assistance, gender reassignment surgery) (48,49,171–175). |
| Gender diverse and minority populations    | Those whose gender identify and expression do not conform to societal norms associated with their birth-assigned sex including but not limited to transgender, intersex, non-binary, gender neutral, gender fluid, gender non-conforming (168,169).                                                                              |
| Gender dysphoria                           | Emotional distress due to incongruence between sex and gender identity (40).                                                                                                                                                                                                                                                     |
| Gender expression                          | The way in which people manifest, convey and present their gender (170).                                                                                                                                                                                                                                                         |
| Gender identity                            | Internal sense of gender (170).                                                                                                                                                                                                                                                                                                  |
| Heteronormative                            | The concept that heterosexuality is the preferred or normal mode of sexual orientation, assuming the gender binary (i.e., that there are only two distinct, opposite genders) (39).                                                                                                                                              |
| Intersex                                   | Those who may have the biological attributes of both sexes or whose biological attributes do not fit with societal assumptions about what constitutes male or female (169).                                                                                                                                                      |
| Medical transition                         | Taking hormones (e.g., testosterone or oestrogen) and/or undergoing surgery to align one's body with their gender identity (40,49,176,177).                                                                                                                                                                                      |
| Partner notification                       | When sex partners are informed of their exposure to an STI or HIV (178).                                                                                                                                                                                                                                                         |
| Pre-exposure prophylaxis (PrEP)            | An antiretroviral drug to reduce the risk of acquiring HIV (179).                                                                                                                                                                                                                                                                |
| Queer                                      | A term used by those wanting to reject specific labels of romantic orientation, sexual orientation and/or gender identity (168,169).                                                                                                                                                                                             |
| Questioning                                | Exploring one's sexual orientation and/or gender identity (168,169).                                                                                                                                                                                                                                                             |
| Sex                                        | Biological characteristics, such as chromosomes and reproductive organs, traditionally associated with male and female; however, sex is not binary, given the significant overlap in sex characteristics between 'male' and 'female' people (39).                                                                                |
| Sexual and reproductive health             | An umbrella term for issues including the absence of illness or disease, such as STIs and HIV; pregnancy, fertility and reproductive matters; sexual safety, freedom from coercion, violence or abuse; and sexual wellbeing and the ability to express one's sexuality (151,180,181).                                            |
| Sexual and reproductive health care (SRHC) | Information, advice and support, and clinical care for: 1) STI and HIV prevention, testing, and treatment; 2) fertility and pregnancy prevention, preservation, assistance, and termination; 3) sexual safety, abuse, and violence; and 4) sexual wellbeing (e.g., STI/HIV                                                       |

|                                                     |                                                                                                                                                                                                                                                      |
|-----------------------------------------------------|------------------------------------------------------------------------------------------------------------------------------------------------------------------------------------------------------------------------------------------------------|
|                                                     | testing; PrEP; partner notification; human papillomavirus vaccination; contraception; in vitro fertilization; intrauterine insemination; medication to prevent pregnancy; counselling) (182–189).                                                    |
| Sexual orientation diverse and minority populations | Those whose attraction to others is non-heterosexual including, but not limited to, lesbian, gay, bisexual, pansexual, queer, questioning (168,169).                                                                                                 |
| Sexual wellbeing                                    | Satisfaction with sexual relationships and functioning; comfort with sexuality; resilience and forgiveness regarding sexual experience; and sexual awareness, self-esteem, security, and respect (149,151).                                          |
| Social transition                                   | Altering one’s gender expression, appearance, and other social aspects to match their gender identity, such as clothes, hair, name, pronouns (40,170).                                                                                               |
| Telemedicine                                        | Video conferencing for conversations or counselling with a healthcare provider (123).                                                                                                                                                                |
| Trans                                               | An umbrella term for gender diverse and minority populations (173).                                                                                                                                                                                  |
| Transgender health                                  | Living in the gender that feels most authentic and comfortable, based on the premise that sex and gender are distinct. This can involve gender affirmation and transition to align one’s body and gender expression with their gender identity (39). |
| Transgender healthcare                              | Information, support, and clinical care regarding gender identity, expression, and transition. Includes but is broader than gender affirming care (47)                                                                                               |
| Youth                                               | Approximately ages 10-35 years; encompasses ‘youth’, ‘young people’, ‘teens’, ‘adolescents’, and ‘young adults’ (e.g., 1,28,63,190–194).                                                                                                             |

## S2 Appendix

### S2 Appendix: Deviations from the protocol.

There were four deviations from the protocol, listed below.

1. A quality appraisal was not conducted, as the high-volume of papers and heterogeneity of services led to an alteration of research questions regarding acceptability and barriers/facilitators to simply state the number of studies that explored these concepts, rather than conducted further analyses to make interpretations or draw conclusions about acceptability.
2. “and evaluate the methodological quality of” was removed from the objective, as a quality appraisal was no longer needed.
3. Four of the six original research questions (RQs) were altered and one was deleted (see S2 Table for an overview and rationale for each) – RQ6 remained unchanged but was renumbered as RQ3. All RQs were updated to refer to ‘transgender healthcare’ in place of ‘gender healthcare’ for a more accurate representation of the concept. Additionally, ‘developed’ was removed from all RQs – while this was still included in the eligibility criteria, this terminology is outdated.
4. A grey literature search was not conducted due to the unexpectedly high number of included studies from the database search – a grey literature search was deemed unnecessary given the high volume of peer-reviewed, published papers.

**S2 Table. Deviations in research questions from protocol.**

| Research question | Protocol                                                                                                                                                                    | Paper                                                                                                                                                                                                                          | Rationale                                                                                                                                                                                                                                                                                                                                                                                                                                                                                                                                                                                                                                                                                     |
|-------------------|-----------------------------------------------------------------------------------------------------------------------------------------------------------------------------|--------------------------------------------------------------------------------------------------------------------------------------------------------------------------------------------------------------------------------|-----------------------------------------------------------------------------------------------------------------------------------------------------------------------------------------------------------------------------------------------------------------------------------------------------------------------------------------------------------------------------------------------------------------------------------------------------------------------------------------------------------------------------------------------------------------------------------------------------------------------------------------------------------------------------------------------|
| RQ1               | What dimensions of digital SRHC and GHC for LGBTQI+ youth in high-income, developed countries have received attention in the literature and who are the target populations? | What types of online sexual and reproductive healthcare and transgender healthcare have received attention for LGBTQI+ youth and where are there gaps?                                                                         | 'and who were the target populations [of online sexual, reproductive and transgender healthcare]' was removed, as this was better addressed in a separate research question (RQ2) in the results.                                                                                                                                                                                                                                                                                                                                                                                                                                                                                             |
| RQ2               | What are the characteristics of LGBTQI+ youth in research regarding digital SRHC and GHC and accessing and using digital SRHC and GHC in high-income, developed countries?  | Who are the target LGBTQI+ youth populations of online sexual and reproductive healthcare and transgender healthcare research, which additional intersectional characteristics have been considered, and where are there gaps? | The question about who was 'accessing and using' digital SRHC and transgender healthcare was removed, as the data available did not support answering this. Additionally, the question about the 'characteristics of LGBTQI+ youth in research' was replaced by 'who are the target LGBTQI+ youth populations in research' and 'what intersectional characteristics have been considered in recruitment', as these questions better represent the author's intentions to identify which LGBTQI+ youth populations were the target of digital healthcare services and interventions.                                                                                                           |
| RQ3               | What is the acceptability of digital SRHC and GHC in high-income, developed countries for LGBTQI+ youth?                                                                    | Deleted                                                                                                                                                                                                                        | Given the volume of final included papers, studies exploring acceptability, barriers, and facilitators were too heterogenous with regards to participants and concepts to conduct a cross-study analysis. Continuing with this analysis would have resulted in potentially misleading findings, given the diversity of LGBTQI+ populations, skewed focus on GBMSM, and variation in digital platforms and healthcare types. A follow up, more focused, systematic review would be more appropriate to address the original question. Detail on how many papers explored acceptability, barriers, and facilitators can be found in Appendix 7. This will be addressed in the final PhD thesis. |
| RQ4               | What are the barriers and facilitators to LGBTQI+ youth accessing and using digital SRHC and GHC in high-income, developed countries?                                       | Deleted                                                                                                                                                                                                                        |                                                                                                                                                                                                                                                                                                                                                                                                                                                                                                                                                                                                                                                                                               |
| RQ5               | How is LGBTQI+ 'youth' defined in digital SRHC and GHC research from high-income, developed countries?                                                                      | Deleted                                                                                                                                                                                                                        | This question was anticipated to lack in research impact and age ranges were addressed under the research question about target populations. This will be addressed in the final PhD thesis.                                                                                                                                                                                                                                                                                                                                                                                                                                                                                                  |
| RQ6               | How, if at all, have theory or frameworks been used in research into digital SRHC and GHC for LGBTQI+ youth in high-income, developed countries?                            | How, if at all, have theories, models, and frameworks been used in research into online sexual and reproductive healthcare and transgender healthcare for LGBTQI+ youth?                                                       |                                                                                                                                                                                                                                                                                                                                                                                                                                                                                                                                                                                                                                                                                               |

## S3 Appendix

### **S3 Appendix: Inclusion and exclusion criteria for eligibility by participant, concept, and context (PCC) and their rationale.**

Regarding Participants, LGBTQI+ included gender and sexual orientation diverse and minority identifying participants as the target population, inclusive of all terms to describe sexual minorities and gender diverse populations (e.g., non-binary, gender non-conforming, gender fluid, and gender neutral (168,169)). ‘Youth’ refers to the target populations of ‘youth’, ‘young people’, ‘young adults’ and ‘adolescents/teens’ and/or included participants within an age range of 10-35 years. This broad age range was selected to capture the maximum number of studies based on an initial search of online SRHC and transgender healthcare for LGBTQI+ youth research (e.g., 10-20, (191); 13-29, (1); 16-24, (63); 16-29, (28); 18-26, (192); 15-34, (194)).

Within Concept were four key components: online; sexual and reproductive health; transgender health; and healthcare. Here, ‘online’ encompassed all SRHC and transgender healthcare delivered via internet based digital technology including, but not limited to websites; web apps; mobile apps; short messaging service (SMS); email; and video calls (e.g., 195). Sexual and reproductive health included all aspects of sexual and reproductive health including infection and disease (e.g., STIs and BBVs), fertility and pregnancy, sexual wellbeing, and sexual safety, violence, and abuse (151,180,181). Transgender health included all aspects of gender identity, expression, transition, and affirmation (39). Moreover, taking an inclusive approach to ‘healthcare’, this included the delivery or engagement with any interventions or services aimed at preventing, treating, or managing illness or disease or promoting wellbeing related to sexual and reproductive health and transgender health for LGBTQI+ youth. Services refer to existing online SRHC or transgender healthcare for help-seeking, such as information on websites; advice or support via text-based conversations with peers or trained professionals such as bi-directional email, SMS text live chat (synchronous text-based chat platform), forums, social media groups; or clinical care, such as access to online STI/HIV self-sampling kits, partner notification, PrEP, contraception, counselling, or e-consultations (virtual/remote platforms for video or audio consultations with healthcare provider) (e.g., 11,16,19,46,196–198). Interventions refer to online strategies that have been developed to change a specific sexual and reproductive health or transgender health related behaviour(s) or outcome(s) for LGBTQI+ youth populations including education programmes to increase knowledge (e.g., 58,70,79,93,94,104,107,114,199), support for accessing or using services such as signposting to local services (e.g., 200), or novel provision of a digital version of a service that is typically delivered in person (e.g., 201–203).

Finally, for Context, this scoping review seeks to form a foundational understanding of how to optimize UK-based online SRHC for LGBTQI+ youth. As online SRHC and transgender healthcare and barriers to care can differ considerably between countries, depending on infrastructure and social welfare/protections for access to health care (204,205), we focus on countries with similar contexts to the UK. Therefore, studies from high-income and developed economy countries, as defined by the United Nations (UN) (57), were included.

See S3 Table for further detail and rationales.

**S3 Table. Inclusion and exclusion criteria for eligibility by participant, concept, and context (PCC) and their rationale.**

| PCC                           | Inclusion                                                                                                                                                                                                                                                                                                                                                                                                                                                                                                       | Exclusion                                                                                                                                                                                                                                                                                                                                                                                          | Rationale                                                                                                                                                                                                                                                                                                                                                                                                                                                                                                                                                                                                                                                                 |
|-------------------------------|-----------------------------------------------------------------------------------------------------------------------------------------------------------------------------------------------------------------------------------------------------------------------------------------------------------------------------------------------------------------------------------------------------------------------------------------------------------------------------------------------------------------|----------------------------------------------------------------------------------------------------------------------------------------------------------------------------------------------------------------------------------------------------------------------------------------------------------------------------------------------------------------------------------------------------|---------------------------------------------------------------------------------------------------------------------------------------------------------------------------------------------------------------------------------------------------------------------------------------------------------------------------------------------------------------------------------------------------------------------------------------------------------------------------------------------------------------------------------------------------------------------------------------------------------------------------------------------------------------------------|
| <b>Participants</b>           |                                                                                                                                                                                                                                                                                                                                                                                                                                                                                                                 |                                                                                                                                                                                                                                                                                                                                                                                                    |                                                                                                                                                                                                                                                                                                                                                                                                                                                                                                                                                                                                                                                                           |
| Sexual orientation and gender | <p>Studies with all LGBTQI+ gender and sexual orientation diverse and minority identifying participants as the target population, inclusive of all terms to describe sexual minorities and gender diverse populations (e.g., non-binary, gender non-conforming, gender fluid, and gender neutral (168,169).</p> <p>Studies with a third party (e.g., parents/ healthcare provider) as the actor for an intervention and LGBTQI+ youth as the target (see AACTT: Actor, Action, Context, Target, Time (206).</p> | <p>Studies that did not report on findings and conclusions for LGBTQI+ participants (i.e., reported findings and conclusions for only non-LGBTQI+)</p> <p>Studies where data and conclusions for LGBTQI+ participants could not be disaggregated from non-LGBTQI+ participant data and conclusions (i.e., reported findings and conclusions for combined LGBTQI+ and non-LGBTQI+ populations).</p> | <p>‘LGBTQI+ (youth) are disproportionately at risk for STIs/HIV, early and unplanned pregnancy, sexual abuse/ violence, and low sexual wellbeing. LGBTQI+ (youth) also face considerable (and largely shared) barriers to in-person sexual healthcare (e.g., stigma, discrimination, healthcare provider lack of knowledge). LGBTQI+ (youth) also have low sexual health help-seeking behaviour.</p> <p>Trans and gender diverse youth experience stigma related anxiety and depression and have high rates of suicide. Trans and gender diverse youth also have significant barriers to accessing in-person gender affirming care.</p>                                   |
| Age                           | <p>Studies that categorized target populations as ‘youth’, ‘young people’, ‘young adults’ and ‘adolescents/teens’ and/or included participants within an age range of 10-35 years.</p>                                                                                                                                                                                                                                                                                                                          | <p>Research focusing on non-youth populations (i.e., reported findings for child or adult populations, below 10 and above 35 years of age) or where data from participants within the age range of 10-35 years could not be disaggregated from child/adult populations.</p>                                                                                                                        | <p>The age range is deliberately broad as there is no standardized definition of ‘youth’ or its synonyms used in research. The World health Organization (WHO) and United Nations (UN) define ‘youth’ as 15-24 years, ‘young people’ as 10-24 years and ‘adolescents’ as 10-19 years (190). However, research into SRHC and gender affirming care for LGBTQI+ youth employ a wider age range between 10 to 35 years (e.g., 10-20, (191); 13-29, (1); 16-24, (63); 16-29, (28); 18-26, (192); 15-34, (194)). Additionally, ‘youth’ is categorized in various age ranges across countries’ legal and policy frameworks and research, ranging from 10 to 29 years (193).</p> |
| <b>Concept</b>                |                                                                                                                                                                                                                                                                                                                                                                                                                                                                                                                 |                                                                                                                                                                                                                                                                                                                                                                                                    |                                                                                                                                                                                                                                                                                                                                                                                                                                                                                                                                                                                                                                                                           |
| Online                        | <p>‘Online’ encompasses all internet-based digitally mediated SRHC and transgender healthcare including, but not limited to websites; web apps; mobile apps; text messaging or short messaging</p>                                                                                                                                                                                                                                                                                                              | <p>Studies that reported on non-digital SRHC and transgender healthcare delivered in-person or by phone or if it was not possible to disaggregate data relating to digital from non-digital.</p>                                                                                                                                                                                                   | <p>Online healthcare has the potential to overcome barriers to traditional (i.e., in-person and phone) healthcare and increase sexual health help-seeking behaviour (28–31).</p>                                                                                                                                                                                                                                                                                                                                                                                                                                                                                          |

|                                    |                                                                                                                                                                                                                                                                                                                                                                                                                                                                                                                                                                       |                                                                                                                                                                                                                  |                                                                                                                                                                                                                                                                                                                                                                                                                                              |
|------------------------------------|-----------------------------------------------------------------------------------------------------------------------------------------------------------------------------------------------------------------------------------------------------------------------------------------------------------------------------------------------------------------------------------------------------------------------------------------------------------------------------------------------------------------------------------------------------------------------|------------------------------------------------------------------------------------------------------------------------------------------------------------------------------------------------------------------|----------------------------------------------------------------------------------------------------------------------------------------------------------------------------------------------------------------------------------------------------------------------------------------------------------------------------------------------------------------------------------------------------------------------------------------------|
|                                    | <p>service (SMS); email; and video calls (e.g., 207,208).</p> <p>Studies that reported on hybrid in-person and online options and if they reported on both digital and non-digital SRHC and transgender healthcare and it was possible to disaggregate the digital from the non-digital data.</p>                                                                                                                                                                                                                                                                     | <p>Studies that focused on the recruitment of participants (e.g., online recruitment to SRHC or gender affirming care interventions, or recruitment to online SRHC or transgender healthcare interventions).</p> |                                                                                                                                                                                                                                                                                                                                                                                                                                              |
| Sexual and reproductive healthcare | <p>Sexual and reproductive health encompasses all matters relating to sexual and reproductive health and wellbeing (e.g., STIs/ BBV/ HIV, sexual safety, abuse, or violence, and sexual wellbeing, fertility, pregnancy, and reproduction)</p>                                                                                                                                                                                                                                                                                                                        |                                                                                                                                                                                                                  |                                                                                                                                                                                                                                                                                                                                                                                                                                              |
| Transgender healthcare             | <p>Transgender health encompasses all issues relating to gender identity, expression, affirmation, and transition</p>                                                                                                                                                                                                                                                                                                                                                                                                                                                 | <p>Studies focusing on care for mental health (e.g., anxiety, depression) were excluded.</p>                                                                                                                     | <p>While anxiety and depression are key mental health issues experienced by LGBTQI+ youth, particularly trans youth, this is distinct from gender health (i.e., gender identity, expression, affirmation and transition). Gender affirmation and receiving gender affirming care have been found to improve the mental health and wellbeing of LGBTQI+ youth, reduce anxiety, depression, and suicidal ideation and behaviour (209–211).</p> |
| Healthcare                         | <p>Studies that focused on the provision of or engagement with online services and interventions (for sexual and reproductive health and transgender health e.g., 196).</p> <p>Studies that focused on changing a specific behaviour(s) or outcome(s) (e.g., 199,200,208,211) relating to sexual and reproductive health or transgender health.</p> <p>Studies that reported on online versions of services typically delivered in person (e.g., 201–203).</p> <p>Taking an inclusive approach to ‘healthcare’, this included the delivery or engagement with any</p> |                                                                                                                                                                                                                  |                                                                                                                                                                                                                                                                                                                                                                                                                                              |

|                |                                                                                                                                                                                                                                                                                                                                                                                                                                                                                                                                                                                                                                                                                                                                                                                                                                                                                                                                                                                                                                                                                                                                                                                                                                                                                                                             |                                                                                                                                                    |                                                                                                                                                                                                                                                                                                                                                                                                                                              |
|----------------|-----------------------------------------------------------------------------------------------------------------------------------------------------------------------------------------------------------------------------------------------------------------------------------------------------------------------------------------------------------------------------------------------------------------------------------------------------------------------------------------------------------------------------------------------------------------------------------------------------------------------------------------------------------------------------------------------------------------------------------------------------------------------------------------------------------------------------------------------------------------------------------------------------------------------------------------------------------------------------------------------------------------------------------------------------------------------------------------------------------------------------------------------------------------------------------------------------------------------------------------------------------------------------------------------------------------------------|----------------------------------------------------------------------------------------------------------------------------------------------------|----------------------------------------------------------------------------------------------------------------------------------------------------------------------------------------------------------------------------------------------------------------------------------------------------------------------------------------------------------------------------------------------------------------------------------------------|
|                | <p>interventions or services aimed at preventing, treating, or managing illness or disease or promoting wellbeing related to sexual and reproductive health and transgender health for LGBTQI+ youth. Services refer to existing online SRHC or transgender healthcare for help-seeking, such as information on websites; advice or support via text-based conversations with peers or trained professionals such as bi-directional email, SMS text live chat (synchronous text-based chat platform), forums, social media groups; or clinical care, such as access to online STI/HIV self-sampling kits, partner notification, PrEP, contraception, counselling, or e-consultations (virtual/remote platforms for video or audio consultations with healthcare provider) (e.g., 11,16,19,46,196–198). Interventions refer to online strategies that have been developed to change a specific sexual and reproductive health or transgender health related behaviour(s) or outcome(s) for LGBTQI+ youth populations including education programmes to increase knowledge (e.g., 58,70,79,93,94,104,107,114,199), support for accessing or using services such as signposting to local services (e.g., 200), or novel provision of a digital version of a service that is typically delivered in person (e.g., 201–203).</p> |                                                                                                                                                    |                                                                                                                                                                                                                                                                                                                                                                                                                                              |
| <b>Context</b> |                                                                                                                                                                                                                                                                                                                                                                                                                                                                                                                                                                                                                                                                                                                                                                                                                                                                                                                                                                                                                                                                                                                                                                                                                                                                                                                             |                                                                                                                                                    |                                                                                                                                                                                                                                                                                                                                                                                                                                              |
| Country        | <p>Studies from high-income and developed economy countries, as defined by the UN (57), were included: Australia; Austria; Belgium; Canada; Croatia; Cyprus; Czech Republic; Denmark; Estonia; Finland; France; Germany; Greece; Hungary; Iceland; Ireland; Italy; Japan; Latvia; Lithuania; Luxembourg; Malta; Netherlands; New Zealand; Norway; Poland; Portugal; Slovakia; Slovenia;</p>                                                                                                                                                                                                                                                                                                                                                                                                                                                                                                                                                                                                                                                                                                                                                                                                                                                                                                                                 | <p>Studies conducted in low-and-middle-income countries or countries with economies in transition and developing economies (56) were excluded.</p> | <p>This scoping review is part of a wider PhD program of formative research aiming to provide theoretically informed and evidence-based guidance for how to optimize digital SRHC and transgender healthcare for LGBTQI+ youth in the UK. Therefore, these context inclusion criteria are necessary to ensure the findings from included studies will be maximally generalizable and applicable across countries similar to the UK, with</p> |



|      |                                                               |                                                                                                                                                                                                    |                                                                                                                                                                                                                                                                                                                                                                                                             |
|------|---------------------------------------------------------------|----------------------------------------------------------------------------------------------------------------------------------------------------------------------------------------------------|-------------------------------------------------------------------------------------------------------------------------------------------------------------------------------------------------------------------------------------------------------------------------------------------------------------------------------------------------------------------------------------------------------------|
|      | Spain; Sweden; Switzerland; UK; and United States of America. |                                                                                                                                                                                                    | regards to access to the internet and digital technology and the provision of social policies which support access to health care (160,204,205,213–224). While there is a move away from the terms ‘developed’ and ‘developing’ (225), these are still the terms currently used by the UN as of 2023 (57).                                                                                                  |
| Date | Studies published from 2018 onward.                           | Studies published before 2018 were also excluded to ensure only the most up-to-date information is included in this scoping review, relevant to current global cultural and social climates (226). | To return a collection of the most up-to-date studies conducted in the past five years. Data older than 2018 may not be relevant in the rapidly expanding and changing field of online SRHC and gender affirming care (227–229). LGBTQI+ rights have been subject to much discussion and change over the past five years, which may impact provision of and access to SRHC and gender affirming care (226). |

## S4 Appendix

### S4 Appendix: Search terms generated for MEDLINE (EBSCO).

| Search string                          | Search terms <sup>a</sup>                                                                                                                                                                                                                                                                                                                                                                                                                                                                                                                                                                                                                                                                                                                                                                                                                                                                                                                                                                                                                                                                                                                                                                                                                                                                                                                                                                                                                                                                                                                                                                                                                                                                                                                                                                                                                                                                             |
|----------------------------------------|-------------------------------------------------------------------------------------------------------------------------------------------------------------------------------------------------------------------------------------------------------------------------------------------------------------------------------------------------------------------------------------------------------------------------------------------------------------------------------------------------------------------------------------------------------------------------------------------------------------------------------------------------------------------------------------------------------------------------------------------------------------------------------------------------------------------------------------------------------------------------------------------------------------------------------------------------------------------------------------------------------------------------------------------------------------------------------------------------------------------------------------------------------------------------------------------------------------------------------------------------------------------------------------------------------------------------------------------------------------------------------------------------------------------------------------------------------------------------------------------------------------------------------------------------------------------------------------------------------------------------------------------------------------------------------------------------------------------------------------------------------------------------------------------------------------------------------------------------------------------------------------------------------|
| Sexual orientation/<br>gender minority | LGB* OR Lesbian OR Gay OR Bisexual OR lesbians OR gays OR bisexuals OR homosexual OR homosexuals OR Trans OR Transgender OR Transexual OR Transsexual OR "Trans men" OR "Trans women" OR "Trans man" OR "Trans woman" OR Queer OR Questioning OR Intersex OR Asexual OR Aromantic OR Pansexual OR "Men who have sex with men" OR MSM OR "Women who have sex with women" OR WMW OR "Women who have sex with women and men" OR WSWM OR "Women who have sex with men and women" OR WSMW OR "Men who have sex with men and women" OR MSMW OR "Men who have sex with women and men" OR MSWM OR "Gay and bisexual men who have sex with men" OR GBMSM OR Non-binary OR Nonbinary OR "Non binary" OR "Gender non-conforming" OR "Sexual* minority" OR "Sexual identity minority" OR "Sexual orientation minority" OR "sexual* minorities" OR "sexual orientation minorities" OR "sexual identity minorities" OR "sexual-identity minorities" OR "sexual-orientation minorities" OR "sexual* minority" OR "sexual-identity minority" OR "sexual-orientation minority" OR "gender minorities" OR "Gender minority" OR Same-sex OR "same sex" OR Non-heterosexual OR Nonheterosexual OR Non-cisgender OR Noncisgender OR "Gender diverse" OR "Gender-diverse"                                                                                                                                                                                                                                                                                                                                                                                                                                                                                                                                                                                                                                                   |
| Age                                    | Youth OR "Young people" OR "Young adult*" OR "Young-adult" OR "Young person*" OR "Young-person" OR Teen* OR Adolescent* OR "Young MSM" OR "Young GBMSM" OR YMSM OR YBMSM OR young                                                                                                                                                                                                                                                                                                                                                                                                                                                                                                                                                                                                                                                                                                                                                                                                                                                                                                                                                                                                                                                                                                                                                                                                                                                                                                                                                                                                                                                                                                                                                                                                                                                                                                                     |
| Online                                 | Mobile-based OR Mobile-application OR Mobile-App OR "Mobile based" OR "Mobile application" OR "Mobile app" OR Website OR Web-based OR Web-application OR Web-app OR "Web based" OR "Web application" OR "Web app" OR Digital OR "Digital Health" OR eHealth OR mHealth OR Smartphone OR Telehealth OR Telemedicine OR Telecommunication OR "Tele communication" OR "Tele health" OR "Tele medicine" OR "Tele care" OR "Technology Enabled Care Services" OR "TECS" OR "Artificial Intelligence" OR AI OR Artificial-intelligence OR online OR internet OR "Mobile health" OR "electronic health" OR "live chat" OR "video chat" OR "video consultation" OR eConsult OR econsultation OR "internet intervention"                                                                                                                                                                                                                                                                                                                                                                                                                                                                                                                                                                                                                                                                                                                                                                                                                                                                                                                                                                                                                                                                                                                                                                                       |
| Type of health care                    | "Sexual health" OR "Sexual health care" OR "Sexual healthcare" OR "Sexual and reproductive health" OR "Sexual and reproductive health care" OR "Sexual and reproductive healthcare" OR "Reproductive health" OR "Reproductive health care" OR "Reproductive healthcare" STI OR "Sexually transmitted infection" OR STD OR "Sexually transmitted disease" OR HIV OR "Human immunodeficiency virus" OR Chlamydia OR Gonorrh* OR Syphilis OR Herpes OR Hepatitis OR "Bacterial vaginosis" OR "Human papilloma virus" OR "Human papillomavirus" OR HPV OR "Genital warts" OR "condyloma acuminatum" OR Fertility "Pregnancy management" OR "Pregnancy prevention" OR "Pregnancy termination" OR "Pregnancy assistance" OR "Fertility management" OR "Fertility assistance" OR "Fertility preservation" OR "Sexual wellbeing" OR "Sexual well-being" OR "Sexual pleasure" OR "Sexual violence" OR "Sexual abuse" OR "Sexual harassment" OR Gender OR "Gender identity" OR "Gender expression" OR "Gender transition" OR Transition OR "Social transition" OR "Medical transition" OR "Physical transition" OR "Cross sex" OR "gender dysphoria" OR "Partner notification" OR "Partner notification and management" OR "Contact tracing" OR "Pre-exposure prophylax*" OR PrEP OR "Post-exposure prophylax*" OR Contraception OR Condom OR Femidom OR "Dental dam" OR "In vitro fertilisation" OR "In uterine insemination" OR IVF OR IUI OR "Gender affirming" OR "Gender-affirming" OR "Gender reaffirming" OR "Hormone replacement" OR "HRT" OR "Hormone block*" OR "Puberty block*" OR "feminizing hormone" OR "masculinizing hormone" OR "feminising hormone" OR "masculinising hormone" "hormone treatment" OR "hormone therapy" OR "testosterone therapy" OR "STI care" OR "HIV care" OR "Sexual health Service" OR "sexual healthcare service" OR "sexual health care service" OR "Sexual health and |

|          |                                                                                                                                                                                                                                                                                                                                                                                                                                                                                                                                                                                                                                                                                                                                                                                                                                                                                                                                                                                                                                                                                                                                                                                                                                                                                                                                                                                                                                                                                                                                |
|----------|--------------------------------------------------------------------------------------------------------------------------------------------------------------------------------------------------------------------------------------------------------------------------------------------------------------------------------------------------------------------------------------------------------------------------------------------------------------------------------------------------------------------------------------------------------------------------------------------------------------------------------------------------------------------------------------------------------------------------------------------------------------------------------------------------------------------------------------------------------------------------------------------------------------------------------------------------------------------------------------------------------------------------------------------------------------------------------------------------------------------------------------------------------------------------------------------------------------------------------------------------------------------------------------------------------------------------------------------------------------------------------------------------------------------------------------------------------------------------------------------------------------------------------|
|          | <p>reproduction Service" OR "STI Intervention" OR "HIV intervention" OR "sexual health intervention" OR "STI Prevention" OR "HIV prevention" OR "sexual respect" OR "sexual health education" OR "sexual health Information" OR "sexual health promotion" OR "STI Testing" OR "HIV testing" OR "STI self-sampling" OR "HIV self-sampling" OR "HIV self-test" OR "HIV-self-testing" OR "STI treatment" OR "HIV treatment" OR "STI test results" OR "HIV test result" OR "HIV test results" OR "HIV management" OR "STI screening" OR "HIV screening" OR "sexual health Assistance" OR "sexual health advice" OR "sexual health Support" OR "sexual health Counselling" OR "sexual health Therapy" OR "sexual and reproductive health intervention" OR "sexual health and reproduction education" OR "sexual health and reproduction Information" OR "sexual health and reproduction promotion" OR "sexual health and reproduction assistance" OR "sexual health and reproduction advice" OR "sexual health and reproduction Support" OR "sexual health and reproduction Counselling" OR "sexual health and reproduction Therapy" OR "HIV counselling" OR "HIV therapy" OR "HIV support" OR "HIV advice" OR "Gender health" OR "gender affirming therapy" OR "gender affirming support" OR "gender affirming advice" OR "Gender affirming care advice" OR "gender affirming care support" OR "gender health support" OR "gender health advice" OR "AIDS" OR "HIV/AIDS" OR "HIV/STI" OR "STI/HIV" OR "STIs/HIV" OR "HIV/STIs"</p> |
| Limiters | <p>Source type: Scholarly article/Academic journals<br/>Document type: Articles<br/>Language: English<br/>Date: from 2018</p>                                                                                                                                                                                                                                                                                                                                                                                                                                                                                                                                                                                                                                                                                                                                                                                                                                                                                                                                                                                                                                                                                                                                                                                                                                                                                                                                                                                                  |

<sup>a</sup>All terms were searched title/abstract/keywords. All search strings were combined with AND.

## S5 Appendix

### S5 Appendix: Data extraction tool adapted from JBI.

|                      | Variables (columns in Excel)                  | Data extracted                                                                                                                                                                                                                                                                                                                                                               |
|----------------------|-----------------------------------------------|------------------------------------------------------------------------------------------------------------------------------------------------------------------------------------------------------------------------------------------------------------------------------------------------------------------------------------------------------------------------------|
| <b>Study details</b> | Author of publication                         | First author's last name, et al.                                                                                                                                                                                                                                                                                                                                             |
|                      | Date of publication                           |                                                                                                                                                                                                                                                                                                                                                                              |
|                      | Study aim/objective                           | Verbatim from the abstract or introduction                                                                                                                                                                                                                                                                                                                                   |
|                      | Study research questions/ objectives          | Verbatim from the introduction                                                                                                                                                                                                                                                                                                                                               |
|                      | Data collection methods                       | Verbatim or deductive from the methods (categories: Quantitative; Qualitative; Qualitative and Quantitative)                                                                                                                                                                                                                                                                 |
|                      | Data collection method details                | Verbatim from the methods                                                                                                                                                                                                                                                                                                                                                    |
|                      | Analysis methods                              | Verbatim from the methods                                                                                                                                                                                                                                                                                                                                                    |
|                      | Sample size                                   | Verbatim from the methods                                                                                                                                                                                                                                                                                                                                                    |
|                      | Eligibility/Inclusion criteria                | Verbatim from the methods                                                                                                                                                                                                                                                                                                                                                    |
|                      | Recruitment methods                           | Verbatim from methods (including sampling type, where participants were recruited from, how they were recruited)                                                                                                                                                                                                                                                             |
| <b>RQ1 (Concept)</b> | Area of health                                | Deductive based on focus of the study from the title and aim/objective (categories: Sexual Health; Reproductive health; Sexual and Reproductive Health; Transgender health)                                                                                                                                                                                                  |
|                      | Health outcome                                | Inductive, based on the focus of the study, from the title, aim/objective and methods (categories: HIV prevention; STI prevention; HIV and STI prevention; HIV management; HIV stigma reduction; Pregnancy prevention; Sexual health (per se); Reproductive health (per se); Gender identity/expression; and Gender affirmation/transition)                                  |
|                      | Health care type: Education/ Information      | Deductive from the title, aim/objective and methods (refers to services and interventions that impart information only typically to achieve an increase in knowledge (e.g., information about STIs/HIV; contraception; or gender expression and transition).                                                                                                                 |
|                      | Health care type: Education/ Information type | Verbatim from the methods explaining the intervention/service                                                                                                                                                                                                                                                                                                                |
|                      | Health care type: Non-clinical Support        | Deductive from the title, aim/objective and methods (refers to services and interventions that provide non-clinical emotional or practical support, beyond information, typically to achieve a desired outcome (e.g., peer communication for HIV stigma reduction; reminders for increased PrEP adherence; or skill building for increased skills for partner notification). |
|                      | Health care type: Non-clinical support type   | Verbatim from the methods explaining the intervention/service                                                                                                                                                                                                                                                                                                                |
|                      | Health care type: Clinical care               | Deductive from the title, aim/objective and methods (refers to services and interventions for medical care, specific to testing, diagnosing, treating, and managing sexual and reproductive health issues or                                                                                                                                                                 |

|                                         |                                                                                                                      |                                                                                                                            |
|-----------------------------------------|----------------------------------------------------------------------------------------------------------------------|----------------------------------------------------------------------------------------------------------------------------|
|                                         |                                                                                                                      | gender affirming care (e.g., STI/HIV testing; uptake or maintenance of PrEP; consultations for gender affirming hormones). |
|                                         | Health care type: Clinical care type                                                                                 | Verbatim from the methods explaining the intervention/service                                                              |
|                                         | Online type                                                                                                          | Verbatim from the title, abstract, aim, and/or methods explaining the intervention/service                                 |
|                                         | Intervention/service                                                                                                 | Deductive from the methods describing the intervention/service (categories: Intervention; Service)                         |
|                                         | Real/Hypothetical                                                                                                    | Deductive from the methods describing the intervention/service (categories: Intervention; Service)                         |
|                                         | Intervention name                                                                                                    | Verbatim from title, introduction, aim, or methods                                                                         |
|                                         | Intervention/service details                                                                                         | Verbatim from the methods describing the intervention/service                                                              |
| <b>RQ2<br/>(Participants)</b>           | Target LGBTQI+ population                                                                                            | Verbatim from title, aim, and/or methods                                                                                   |
|                                         | Target LGBTQI+ population age range                                                                                  | Verbatim from introduction, aim, or methods                                                                                |
|                                         | PROGRESS+: Place of residence                                                                                        | Deductive from recruitment or eligibility/inclusion criteria in the methods (categories: N; Y with verbatim details)       |
|                                         | PROGRESS+: Race/ Ethnicity                                                                                           | Deductive from recruitment or eligibility/inclusion criteria in the methods (categories: N; Y with verbatim details)       |
|                                         | PROGRESS+: Occupation                                                                                                | Deductive from recruitment or eligibility/inclusion criteria in the methods (categories: N; Y with verbatim details)       |
|                                         | PROGRESS+: Gender/Sex                                                                                                | Deductive from recruitment or eligibility/inclusion criteria in the methods (categories: N; Y with verbatim details)       |
|                                         | PROGRESS+: Religion                                                                                                  | Deductive from recruitment or eligibility/inclusion criteria in the methods (categories: N; Y with verbatim details)       |
|                                         | PROGRESS+: Education                                                                                                 | Deductive from recruitment or eligibility/inclusion criteria in the methods (categories: N; Y with verbatim details)       |
|                                         | PROGRESS+: Socio-economic status (income)                                                                            | Deductive from recruitment or eligibility/inclusion criteria in the methods (categories: N; Y with verbatim details)       |
|                                         | PROGRESS+: Social network                                                                                            | Deductive from recruitment or eligibility/inclusion criteria in the methods (categories: N; Y with verbatim details)       |
|                                         | PROGRESS+: Age                                                                                                       | Deductive from recruitment or eligibility/inclusion criteria in the methods (categories: N; Y with verbatim details)       |
|                                         | PROGRESS+: Disability                                                                                                | Deductive from recruitment or eligibility/inclusion criteria in the methods (categories: N; Y with verbatim details)       |
|                                         | PROGRESS+: Sexuality                                                                                                 | Deductive from recruitment or eligibility/inclusion criteria in the methods (categories: N; Y with verbatim details)       |
|                                         | PROGRESS+: Features of relationships                                                                                 | Deductive from recruitment or eligibility/inclusion criteria in the methods (categories: N; Y with verbatim details)       |
| PROGRESS+: Time dependent relationships | Deductive from recruitment or eligibility/inclusion criteria in the methods (categories: N; Y with verbatim details) |                                                                                                                            |

|                |                                        |                                                                                                                                         |
|----------------|----------------------------------------|-----------------------------------------------------------------------------------------------------------------------------------------|
|                | Other: Living with HIV                 | Deductive from recruitment or eligibility/inclusion criteria in the methods (categories: N; Y with verbatim details)                    |
|                | Target descriptor category             | Verbatim from title, aim, and/or methods (categories: youth; young [LGBTQI+]; young adults; young people; teen; adolescent – from)      |
|                | Participant age range                  | Verbatim from methods                                                                                                                   |
|                | Participant age stats                  | Verbatim from methods (including mean and standard deviation; median and interquartile range; age range percentages)                    |
| <b>RQ3</b>     | Theory/Model/Framework                 | Verbatim from introduction or methods                                                                                                   |
|                | How Theory/Model/Framework was used    | Verbatim and summarized from the introduction, methods, results, or discussion (refers to any/all detail on the Theory/Model/Framework) |
|                | Descriptive/Social lens                | Inductive from the introduction, methods, results, or discussion (categories: Y; N)                                                     |
|                | Predictive/Applied                     | Inductive from the introduction, methods, or results (categories: Y; N)                                                                 |
|                | Unclear                                | Inductive from the introduction, methods, or results (categories: Y; N)                                                                 |
|                | Number of Theory/Model/Frameworks used | Calculated from description of Theory/Model/Frameworks in introduction or methods                                                       |
| <b>Context</b> | Country                                | Verbatim from methods or inductive from introduction or methods                                                                         |

<sup>a</sup>Where a study did not report a data point, this was extracted as N/R (not reported).

For RQ1, data were extracted and analyzed regarding areas of health, health outcomes, types of healthcare, and online platforms explored. For areas of health, papers were deductively categorized as belonging to sexual, reproductive, or transgender health. For health outcomes, data were inductively identified from the aim or methods of the paper. For types of healthcare, data were deductively categorized as Education/Information, Non-clinical Support, and Clinical Care. Education/Information refers to services and interventions that impart information only typically to achieve an increase in knowledge (e.g., information about STIs/HIV; contraception; or gender expression and transition). Non-clinical Support refers to services and interventions that provide non-clinical emotional or practical support, beyond information, typically to achieve a desired outcome (e.g., peer communication for HIV stigma reduction; reminders for increased PrEP adherence; or skill building for increased skills for partner notification). Clinical care refers to services and interventions for medical care, specific to testing, diagnosing, treating, and managing sexual and reproductive health issues or gender affirming care (e.g., STI/HIV testing; uptake or maintenance of PrEP; consultations for gender affirming hormones). Finally, for online platforms, the verbatim terms used in papers by authors were extracted. For online platforms, data were extracted from the title, research aims, or methods using the verbatim terms used in papers by authors.

For RQ2, data were extracted and analyzed regarding which LGBTQI+ populations were targeted for the intervention/service and which intersectional factors were considered in eligibility or recruitment. For target LGBTQI+ populations, data were extracted from the title or methods using the verbatim terms used in papers by authors. For analysis, different terms with the same or similar meanings were combined, for example, 'same sex attracted boys/men', 'gay men', 'men who have sex with men', were categorized as GBMSM. Moreover, the PROGRESS+ framework (PROGRESS and other factors associated with inequalities in health outcomes, including Sexual orientation, Age, and Disability) (22,23) was used to identify how intersectionality was considered. We also included Living with HIV as an additional factor.

For RQ3, frequency counts and percentages were calculated for the number of papers that reported use of one or more theory, model or framework (hereby framework) and how they were used. In extraction, how frameworks were used was captured deductively, grouped into either 'Theoretical' or 'Applied'. 'Theoretical' describes when frameworks were used to provide a contextual lens for understanding how social structures influence people's experiences. 'Applied' describes when frameworks were used in an applied manner, for example, for development of study materials or intervention content, or to guide analyses or evaluation.

## References

1. Wood SM, Salas-Humara C, Dowshen NL. Human Immunodeficiency Virus, Other Sexually Transmitted Infections, and Sexual and Reproductive Health in Lesbian, Gay, Bisexual, Transgender Youth. *Pediatr Clin North Am*. 2016 Dec 1;63(6):1027–55.
2. Quinn GP, Tishelman AC, Chen D, Nahata L. Reproductive health risks and clinician practices with gender diverse adolescents and young adults. *Andrology*. 2021 Nov 1;9(6):1689–97.
3. Reisner SL, Jadwin-Cakmak L, Sava L, Liu SS, Harper GW. Situated vulnerabilities, sexual risk, and sexually transmitted infections’ diagnoses in a sample of transgender youth in the United States. *AIDS Patient Care STDS*. 2019 Mar 1;33(3):120–30.
4. Day S, Smith J, Perera S, Jones S, Kinsella R. Beyond the binary: sexual health outcomes of transgender and non-binary service users of an online sexual health service. *Int J STD AIDS*. 2021 Sep 1;32(10):896–902.
5. Epps B, Markowski M, Cleaver K. A Rapid Review and Narrative Synthesis of the Consequences of Non-Inclusive Sex Education in UK Schools on Lesbian, Gay, Bisexual, Transgender and Questioning Young People. *Journal of School Nursing*. 2023 Feb 1;39(1):87–97.
6. UK Health Security Agency. Official Statistics Sexually transmitted infections (STIs): annual data tables - Table 2: new STI diagnosis numbers and rates in England and regions by gender, sexual orientation, age group and ethnic group, 2018 to 2022 [Internet]. UKHSA. UKHSA; 2022 [cited 2023 Feb 17]. Available from: <https://www.gov.uk/government/statistics/sexually-transmitted-infections-stis-annual-data-tables>
7. Ybarra ML, Goodman KL, Saewyc E, Scheer JR, Stroem IF. Youth Characteristics Associated with Sexual Violence Perpetration among Transgender Boys and Girls, Cisgender Boys and Girls, and Nonbinary Youth. *JAMA Netw Open*. 2022 Jun 3;5(6).
8. Semprevivo LK. Dating and Sexual Violence Victimization among Lesbian, Gay, Bisexual, and Questioning Youth: Considering the Importance of Gender and Sexual Orientation. *J Aggress Maltreat Trauma*. 2021;30(5):662–78.
9. Eisenberg ME, McMorris BJ, Rider GN, Gower AL, Coleman E. “It’s kind of hard to go to the doctor’s office if you’re hated there.” A call for gender-affirming care from transgender and gender diverse adolescents in the United States. *Health Soc Care Community*. 2020 May 1;28(3):1082–9.
10. Atteberry-Ash B, Walls NE, Kattari SK, Peitzmeier SM, Kattari L, Langenderfer-Magruder L. Forced sex among youth: accrual of risk by gender identity, sexual orientation, mental health and bullying. *J LGBT Youth*. 2020 Apr 2;17(2):193–213.
11. Phillips G, Neray B, Janulis P, Felt D, Mustanski B, Birkett M. Utilization and avoidance of sexual health services and providers by YMSM and transgender youth assigned male at birth in Chicago. *AIDS Care*. 2019 Oct 3;31(10):1282–9.
12. Sharma A, Kahle E, Todd K, Peitzmeier S, Stephenson R. Variations in Testing for HIV and Other Sexually Transmitted Infections Across Gender Identity Among Transgender Youth. *Transgend Health*. 2019 Jan 1;4(1):46–57.
13. Newcomb ME, Moran K, Li DH, Mustanski B. Demographic, Regional, and Political Influences on the Sexual Health Care Experiences of Adolescent Sexual Minority Men. *LGBT Health*. 2020 Jan 1;7(1):28–36.
14. Youatt EJ, Harris LH, Harper GW, Janz NK, Bauermeister JA. Sexual Health Care Services Among Young Adult Sexual Minority Women. *Sexuality Research and Social Policy*. 2017 Sep 1;14(3):345–57.
15. Jaiswal J, LoSchiavo C, Meanley S, Hascher K, Cox AB, Dunlap KB, et al. Correlates of PrEP Uptake Among Young Sexual Minority Men and Transgender Women in New York City: The Need to Reframe “Risk” Messaging and Normalize Preventative Health. *AIDS Behav*. 2021 Oct 1;25(10):3057–73.



16. McRee AL, Gower AL, Reiter PL. Preventive healthcare services use among transgender young adults. *International Journal of Transgenderism*. 2018 Oct 2;19(4):417–23.
17. Hudson-Sharp N, Metcalf H. Inequality among lesbian, gay bisexual and transgender groups in the UK: a review of evidence. National Institute of Economic and Social Research. 2016.
18. Fisher CB, Fried AL, Desmond M, Macapagal K, Mustanski B. Perceived barriers to HIV prevention services for transgender youth. *LGBT Health*. 2018 Aug 1;5(6):350–8.
19. Mkhize SP, Maharaj P. Structural violence on the margins of society: LGBT student access to health services. *Agenda*. 2020;34(2):104–14.
20. Logie CH, Lys CL, Dias L, Schott N, Zouboules MR, MacNeill N, et al. “Automatic assumption of your gender, sexuality and sexual practices is also discrimination”: Exploring sexual healthcare experiences and recommendations among sexually and gender diverse persons in Arctic Canada. *Health Soc Care Community*. 2019;27(5):1204–13.
21. Haggipavlou L, Hamshaw RJT. Barriers to PrEP Uptake in Young U.K. Men Who Have Sex With Men. *J Prev Health Promot*. 2023 Aug;4(3–4):404–33.
22. O’Neill J, Tabish H, Welch V, Petticrew M, Pottie K, Clarke M, et al. Applying an equity lens to interventions: Using PROGRESS ensures consideration of socially stratifying factors to illuminate inequities in health. *J Clin Epidemiol*. 2014 Jan;67(1):56–64.
23. Kavanagh J, Oliver S. Reflections on developing and using PROGRESS-Plus. Vol. 2, Cochrane. 2008.
24. Ng HH. Intersectionality and Shared Decision Making in LGBTQ Health. *LGBT Health*. 2016 Oct 1;3(5):325–6.
25. Jones T. Access to Healthcare: Understanding Disparities among LGBT & Black Communities [Internet]. Western Michigan University, Honors Theses. 2015. Available from: [https://scholarworks.wmich.edu/honors\\_theses/2620](https://scholarworks.wmich.edu/honors_theses/2620)
26. Closson K, Smith RV, Olarewaju G, Crosby R. Associations between economic dependence, sexual behaviours, and sexually transmitted infections among young, Black, gay, bisexual and other men who have sex with men living with and without HIV in Jackson, Mississippi, USA. *Sex Health*. 2018;15(5):473–6.
27. Quinn K, Bowleg L, Dickson-Gomez J. “The fear of being Black plus the fear of being gay”: The effects of intersectional stigma on PrEP use among young Black gay, bisexual, and other men who have sex with men. *Soc Sci Med*. 2019 Jul 1;232:86–93.
28. Flanders CE, Pragg L, Dobinson C, Logie C. Young sexual minority women’s use of the internet and other digital technologies for sexual health information seeking. *Canadian Journal of Human Sexuality*. 2017;26(1):17–25.
29. Stephenson R, Todd K, Kahle E, Sullivan SP, Miller-Perusse M, Sharma A, et al. Project Moxie: Results of a Feasibility Study of a Telehealth Intervention to Increase HIV Testing Among Binary and Nonbinary Transgender Youth. *AIDS Behav*. 2020 May 1;24(5):1517–30.
30. Refugio ON, Kimble MM, Silva CL, Lykens JE, Bannister C, Klausner JD. Brief Report: PrEPTECH: A Telehealth-Based Initiation Program for HIV Pre-exposure Prophylaxis in Young Men of Color Who Have Sex with Men. A Pilot Study of Feasibility. *J Acquir Immune Defic Syndr (1988)*. 2019 Jan 1;80(1):40–5.
31. Bauermeister J, Choi SK, Bruehlman-Senecal E, Golinkoff J, Taboada A, Lavra J, et al. An Identity-Affirming Web Application to Help Sexual and Gender Minority Youth Cope With Minority Stress: Pilot Randomized Controlled Trial. *J Med Internet Res*. 2022 Aug 1;24(8).
32. Bradford NJ, DeWitt J, Decker J, Berg DR, Spencer KG, Ross MW. Sex education and transgender youth: ‘Trust Means Material By and For Queer and Trans People.’ *Sex Educ*. 2019 Jan 2;19(1):84–98.
33. Cherenack EM, Wilson PA, Kreuzman AM, Price GN. The Feasibility and Acceptability of Using Technology-Based Daily Diaries with HIV-Infected Young Men Who have Sex with Men: A Comparison of Internet and Voice Modalities. *AIDS Behav*. 2016 Aug 1;20(8):1744–53.

34. Estcourt CS, Gibbs J, Sutcliffe LJ, Gkatzidou V, Tickle L, Hone K, et al. The eSexual Health Clinic system for management, prevention, and control of sexually transmitted infections: exploratory studies in people testing for Chlamydia trachomatis. *Lancet Public Health*. 2017 Apr 1;2(4):e182–90.
35. Bailey J, Mann S, Wayal S, Hunter R, Free C, Abraham C, et al. Sexual health promotion for young people delivered via digital media: a scoping review. *Public Health Research*. 2015 Nov;3(13):1–120.
36. Guse K, Levine D, Martins S, Lira A, Gaarde J, Westmorland W, et al. Interventions using new digital media to improve adolescent sexual health: A systematic review. *Journal of Adolescent Health*. 2012 Dec;51(6):535–43.
37. Maloney KM, Bratcher A, Wilkerson R, Sullivan PS. Electronic and other new media technology interventions for HIV care and prevention: a systematic review. *J Int AIDS Soc*. 2020;23(e25439):1–12.
38. Ortiz-Martínez Y, Ríos-González CM. Need for more research on and health interventions for transgender people. *Sex Health*. 2017;14(2):196–7.
39. Garofalo EM, Garvin HM. The confusion between biological sex and gender and potential implications of misinterpretations. In: *Sex Estimation of the Human Skeleton: History, Methods, and Emerging Techniques*. Elsevier; 2020. p. 35–52.
40. Kuper LE, Lindley L, Lopez X. Exploring the Gender Development Histories of Children and Adolescents Presenting for Gender Affirming Medical Care. *Clin Pract Pediatr Psychol*. 2019;7(3):217–28.
41. Gil-Llario MD, Gil-Juliá B, Giménez-García C, Bergero-Miguel T, Ballester-Arnal R. Sexual behavior and sexual health of transgender women and men before treatment: Similarities and differences. *Int J Transgend Health*. 2021;22(3):304–15.
42. Chen D, Kyweluk MA, Sajwani A, Gordon EJ, Johnson EK, Finlayson CA, et al. Factors Affecting Fertility Decision-Making Among Transgender Adolescents and Young Adults. *LGBT Health*. 2019 Apr 1;6(3):107–15.
43. Andrzejewski J, Raspberry CN, Mustanski B, Steiner RJ. Sexual and Reproductive Health Web Sites: An Analysis of Content for Sexual and Gender Minority Youth. *American Journal of Health Promotion*. 2020 May 1;34(4):393–401.
44. Puckett JA, Cleary P, Rossman K, Mustanski B, Newcomb ME. Barriers to Gender-Affirming Care for Transgender and Gender Nonconforming Individuals. *Sexuality Research and Social Policy*. 2018 Mar 1;15(1):48–59.
45. Scheim AI, Coleman T, Lachowsky N, Bauer GR. Health care access among transgender and nonbinary people in Canada, 2019: a cross-sectional survey. *CMAJ Open*. 2021 Oct 1;9(4):E1213–22.
46. Wright T, Nicholls EJ, Rodger AJ, Burns FM, Weatherburn P, Pebody R, et al. Accessing and utilising gender-affirming healthcare in England and Wales: trans and non-binary people's accounts of navigating gender identity clinics. *BMC Health Serv Res*. 2021 Dec 1;21(1).
47. Gorton N, Grubb HM. General, sexual, and reproductive health. In: Erickson-Schroth L, editor. *Trans Bodies, Trans Selves A Resource for the Transgender Community* [Internet]. 1st ed. Oxford University Press; 2014 [cited 2024 May 21]. Available from: [https://www.google.co.uk/books/edition/\\_/EuB\\_AwAAQBAJ?hl=en&gbpv=1](https://www.google.co.uk/books/edition/_/EuB_AwAAQBAJ?hl=en&gbpv=1)
48. Sterling J, Garcia MM. Fertility preservation options for transgender individuals. *Transl Androl Urol*. 2020 Mar 1;9:S215–26.
49. van de Grift TC. Masculinizing and defeminizing gender-affirming surgery. *Best Pract Res Clin Obstet Gynaecol*. 2023 Jun 1;88.
50. Woodward S, Luu J, Mesure J, Wynne K. A collaborative model aligning adult sexual health and endocrine gender health services. *Sex Health*. 2022 Jul 12;19(4):386–90.

51. Sevelius JM, Patouhas E, Keatley JG, Johnson MO. Barriers and facilitators to engagement and retention in care among transgender women living with human immunodeficiency virus. *Annals of Behavioral Medicine*. 2014 Feb;47(1):5–16.
52. Arksey H, O'Malley L. Scoping studies: Towards a methodological framework. *International Journal of Social Research Methodology: Theory and Practice*. 2005 Feb;8(1):19–32.
53. Peters MDJ, Godfrey C, Mclnerney P, Munn Z, Tricco CC, Khalil H. Chapter 11: Scoping reviews. In: *JBI Manual for Evidence Synthesis* [Internet]. JBI; 2020 [cited 2022 Nov 11]. p. 407–52. Available from: <https://doi.org/10.46658/JBIMES-20-12>
54. Peters MDJ, Godfrey CM, Khalil H, Mclnerney P, Parker D, Soares CB. Guidance for conducting systematic scoping reviews. *Int J Evid Based Healthc*. 2015 Sep 1;13(3):141–6.
55. Mcleod J, Flowers P, Gibbs J, Estcourt CS, Macdonald J. Protocol for a scoping review of literature on digital sexual, reproductive, and gender health care for LGBTQI+ youth. *medRxiv*. 2023;1–43.
56. United Nations. World Economic Situation and Prospects: Statistical annex [Internet]. United Nations. 2019 [cited 2023 May 5]. Available from: [https://www.un.org/development/desa/dpad/wp-content/uploads/sites/45/WESP2019\\_BOOK-ANNEX-en.pdf](https://www.un.org/development/desa/dpad/wp-content/uploads/sites/45/WESP2019_BOOK-ANNEX-en.pdf)
57. United Nations. World Economic Situation and Prospects [Internet]. United Nations. 2023 [cited 2023 May 9]. Available from: <https://desapublications.un.org/publications/world-economic-situation-and-prospects-2023>
58. Ventuneac A, Li DH, Mongrella MC, Moskowitz DA, Weingardt KR, Brown CH, et al. Exploring Potential Implementation Barriers and Facilitators of the SMART Program: A Stepped-Care Package of eHealth HIV Prevention Interventions for Adolescent Men Who Have Sex with Men. *Sexuality Research and Social Policy*. 2020 Sep 1;17(3):378–88.
59. Ybarra ML, Price-Feeney M, Prescott T, Goodenow C, Saewyc E, Rosario M. Girl2Girl: How to develop a salient pregnancy prevention program for cisgender sexual minority adolescent girls. *J Adolesc*. 2020 Dec 1;85:41–58.
60. Sequeira GM, Kidd KM, Coulter RWS, Miller E, Fortenberry D, Garofalo R, et al. Transgender Youths' Perspectives on Telehealth for Delivery of Gender-Affirming Care. *Journal of Adolescent Health*. 2021 Jun 1;68(6):1207–10.
61. McRee AL, Shoben A, Bauermeister JA, Katz ML, Paskett ED, Reiter PL. Outsmart HPV: Acceptability and short-term effects of a web-based HPV vaccination intervention for young adult gay and bisexual men. *Vaccine*. 2018 Dec 18;36(52):8158–64.
62. Ouzzani M, Hammady H, Fedorowicz Z, Elmagarmid A. Rayyan-a web and mobile app for systematic reviews. *Syst Rev*. 2016 Dec 5;5(1).
63. Magee JC, Bigelow L, DeHaan S, Mustanski BS. Sexual Health Information Seeking Online: A Mixed-Methods Study Among Lesbian, Gay, Bisexual, and Transgender Young People. *Health Education and Behavior*. 2012 Jun;39(3):276–89.
64. Ybarra ML, Prescott T, Mustanski B, Parsons J, Bull SS. Feasibility, Acceptability, and Process Indicators for Guy2Guy, an mHealth HIV Prevention Program for Sexual Minority Adolescent Boys. *Journal of Adolescent Health*. 2019 Sep 1;65(3):417–22.
65. Stafylis C, Vavala G, Wang Q, McLeman B, Lemley SM, Young SD, et al. Relative Effectiveness of Social Media, Dating Apps, and Information Search Sites in Promoting HIV Self-testing: Observational Cohort Study. *JMIR Form Res*. 2022 Sep 23;6(9):e35648.
66. Young LE, Fujimoto K, Schneider JA. HIV Prevention and Sex Behaviors as Organizing Mechanisms in a Facebook Group Affiliation Network Among Young Black Men Who Have Sex with Men. *AIDS Behav*. 2018 Oct 1;22(10):3324–34.
67. Blackburn NA, Dong W, Threats M, Barry M, LeGrand S, Hightow-Weidman LB, et al. Building Community in the HIV Online Intervention Space: Lessons from the HealthMPowerment Intervention. *Health Education and Behavior*. 2021 Oct 1;48(5):604–14.

68. Flores DD, Hennessy K, Rosario A, Chung J, Wood S, Kershaw T, et al. Parents ASSIST: Acceptability and feasibility of a video-based educational series for sexuality-inclusive communication between parents and gay, bisexual, and queer sons. *Int J Environ Res Public Health*. 2022 Jan 1;19(1).
69. Sharek D, McCann E, Huntley-Moore S. The design and development of an online education program for families of trans young people. *J LGBT Youth*. 2021;18(2):188–210.
70. Gerend MA, Madkins K, Crosby S, Korpak AK, Phillips GL, Bass M, et al. Evaluation of a Text Messaging-Based Human Papillomavirus Vaccination Intervention for Young Sexual Minority Men: Results from a Pilot Randomized Controlled Trial. *Annals of Behavioral Medicine*. 2021 Apr 1;55(4):321–32.
71. Hightow-Weidman L, Muessig KE, Egger JR, Vecchio A, Platt A. Epic Allies: A Gamified Mobile App to Improve Engagement in HIV Care and Antiretroviral Adherence among Young Men Who have Sex with Men. *AIDS Behav*. 2021 Aug 1;25(8):2599–617.
72. Barry MC, Threats M, Blackburn NA, LeGrand S, Dong W, Pulley D V., et al. “Stay strong! keep ya head up! move on! it gets better!!!!”: resilience processes in the healthMpowerment online intervention of young black gay, bisexual and other men who have sex with men. *AIDS Care - Psychological and Socio-Medical Aspects of AIDS/HIV*. 2018 Aug 23;30(sup5):S27–38.
73. Liu AY, Vittinghoff E, Von Felten P, Rivet Amico K, Anderson PL, Lester R, et al. Randomized Controlled Trial of a Mobile Health Intervention to Promote Retention and Adherence to Preexposure Prophylaxis among Young People at Risk for Human Immunodeficiency Virus: The EPIC Study. *Clinical Infectious Diseases*. 2019 Jun 1;68(12):2010–7.
74. Asiago-Reddy EA, McPeak J, Scarpa R, Braksmajer A, Ruszkowski N, McMahan J, et al. Perceived access to PrEP as a critical step in engagement: A qualitative analysis and discrete choice experiment among young men who have sex with men. *PLoS One*. 2022 Jan 1;17(1 January).
75. Bible J, Kaplan A, Lieberman L, Goldfarb E. A retrospective analysis of sex education messages received by LGB youth. *J LGBT Youth*. 2022;19(3):287–306.
76. Schnall R, Kuhns LM, Hidalgo MA, Powell D, Thai J, Hirshfield S, et al. Adaptation of a group-based HIV risk reduction intervention to a mobile app for young sexual minority men. *AIDS Education and Prevention*. 2018 Dec 1;30(6):449–62.
77. Fontenot HB, Rosenberger JG, McNair KT, Mayer KH, Zimet G. Perspectives and preferences for a mobile health tool designed to facilitate HPV vaccination among young men who have sex with men. *Hum Vaccin Immunother*. 2019 Aug 3;15(7–8):1815–23.
78. Austin A, Craig SL, Navega N, McInroy LB. It’s my safe space: The life-saving role of the internet in the lives of transgender and gender diverse youth. *Int J Transgend Health*. 2020 Jan 2;21(1):33–44.
79. Ybarra ML, Liu W, Prescott TL, Phillips G, Mustanski B. The Effect of a Text Messaging Based HIV Prevention Program on Sexual Minority Male Youths: A National Evaluation of Information, Motivation and Behavioral Skills in a Randomized Controlled Trial of Guy2Guy. *AIDS Behav*. 2018 Oct 1;22(10):3335–44.
80. Nelson KM, Perry NS, Stout CD, Dunsiger SI, Carey MP. The Young Men and Media Study: A Pilot Randomized Controlled Trial of a Community-Informed, Online HIV Prevention Intervention for 14–17-Year-Old Sexual Minority Males. *AIDS Behav*. 2022 Feb 1;26(2):569–83.
81. Bauermeister JA, Tingler RC, Demers M, Connochie D, Gillard G, Shaver J, et al. Acceptability and Preliminary Efficacy of an Online HIV Prevention Intervention for Single Young Men Who Have Sex with Men Seeking Partners Online: The myDEX Project. *AIDS Behav*. 2019 Nov 1;23(11):3064–77.
82. Lee JJ, Aguirre J, Munguia L, Robles G, Ramirez Hernandez K, Ramirez JJ, et al. Engagement of Latino immigrant men who have sex with men for HIV prevention through eHealth: preferences across social media platforms. *Ethn Health*. 2022;27(7):1684–97.

83. Silva C, Fung A, Irvine MA, Ziabakhsh S, Hursh BE. Usability of virtual visits for the routine clinical care of trans youth during the covid-19 pandemic: Youth and caregiver perspectives. *Int J Environ Res Public Health*. 2021 Nov 1;18(21).
84. Schnall R, Kuhns LM, Pearson C, Batey DS, Bruce J, Hidalgo MA, et al. Efficacy of MyPEEPS Mobile, an HIV Prevention Intervention Using Mobile Technology, on Reducing Sexual Risk among Same-Sex Attracted Adolescent Males: A Randomized Clinical Trial. *JAMA Netw Open*. 2022 Sep 21;5(9):E2231853.
85. Hightow-Weidman L, Muessig K, Knudtson K, Srivatsa M, Lawrence E, LeGrand S, et al. A gamified smartphone app to support engagement in care and medication adherence for HIV-positive young men who have sex with men (AllyQuest): Development and pilot study. *JMIR Public Health Surveill*. 2018 Apr 1;4(4).
86. Flanders CE, Dinh RN., Pragg L, Dobinson C, Logie CH. Young Sexual Minority Women's Evaluation Processes of Online and Digital Sexual Health Information. *Health Commun*. 2021;36(10):1286–94.
87. Fish JN, Williams ND, McInroy LB, Pacey MS, Edsall RN, Devadas J, et al. Q Chat Space: Assessing the Feasibility and Acceptability of an Internet-Based Support Program for LGBTQ Youth. *Prevention Science*. 2022 Jan 1;23(1):130–41.
88. Hightow-Weidman LB, LeGrand S, Muessig KE, Simmons RA, Soni K, Choi SK, et al. A Randomized Trial of an Online Risk Reduction Intervention for Young Black MSM. *AIDS Behav*. 2019 May 15;23(5):1166–77.
89. Bauermeister JA, Muessig KE, LeGrand S, Flores DD, Choi SK, Dong W, et al. HIV and Sexuality Stigma Reduction Through Engagement in Online Forums: Results from the HealthMPowerment Intervention. *AIDS Behav*. 2019 Mar 15;23(3):742–52.
90. Biello KB, Horvitz C, Mullin S, Mayer KH, Scott H, Coleman K, et al. HIV self-testing and STI self-collection via mobile apps: Experiences from two pilot randomized controlled trials of young men who have sex with men. *Mhealth*. 2021 Apr 1;7.
91. Reiter PL, Gower AL, Kiss DE, Shoben AB, Katz ML, Bauermeister JA, et al. Effects of a web-based HPV vaccination intervention on cognitive outcomes among young gay, bisexual, and other men who have sex with men. *Hum Vaccin Immunother*. 2022;18(6).
92. Jackman KM, Latkin CA, Maksut JL, Trent ME, Sanchez TH, Baral SD. Patient Portals as Highly Acceptable Tools to Support HIV Preventative Behaviors Among Adolescent and Young Sexual Minority Men. *Journal of Adolescent Health*. 2020 Aug 1;67(2):278–81.
93. Newcomb ME, Swann G, Macapagal K, Sarno EL, Whitton SW, Mustanski B. Biomedical and Behavioral Outcomes of 2GETHER: A Randomized Controlled Trial of a Telehealth HIV Prevention Program for Young Male Couples. *J Consult Clin Psychol*. 2023;91(9):505–20.
94. Mustanski B, Saber R, Macapagal K, Matson M, Laber E, Rodriguez-Diaz C, et al. Effectiveness of the SMART Sex Ed program among 13–18 year old English and Spanish speaking adolescent men who have sex with men. *AIDS Behav*. 2023 Feb 1;27(2):733–44.
95. Ybarra M, Goodenow C, Rosario M, Saewyc E, Prescott T. An mHealth intervention for pregnancy prevention for LGB teens: An RCT. *Pediatrics*. 2021 Mar 1;147(3).
96. Biello KB, Daddario SR, Hill-Rorie J, Futterman D, Sullivan PS, Hightow-Weidman L, et al. Uptake and Acceptability of MyChoices: Results of a Pilot RCT of a Mobile App Designed to Increase HIV Testing and PrEP Uptake Among Young American MSM. *AIDS Behav*. 2022 Dec 1;26(12):3981–90.
97. Mitchell JT, Burns CM, Atkinson B, Cottrell M, Frye JK, McKellar MS, et al. Feasibility, Acceptability, and Preliminary Efficacy of a Gamified Mobile Health Contingency Management Intervention for PrEP Adherence Among Black MSM. *AIDS Behav*. 2022 Oct 1;26(10):3311–24.
98. Martino W, Omercajic K, Cumming-Potvin W. YouTube as a site of desubjugation for trans and nonbinary youth: pedagogical potentialities and the limits of whiteness. *Pedagogy, Culture and Society*. 2021;29(5):753–72.



99. Cho H, Powell D, Pichon A, Thai J, Bruce J, Kuhns LM, et al. A mobile health intervention for HIV prevention among racially and ethnically diverse young men: Usability evaluation. *JMIR Mhealth Uhealth*. 2018 Sep 1;6(9).
100. Russell MR, Rogers RL, Rosenthal SM, Lee JY. Increasing Access to Care for Transgender/Gender Diverse Youth Using Telehealth: A Quality Improvement Project. *Telemedicine and e-Health*. 2022 Jun 1;28(6):847–57.
101. Cordoba E, Idnay B, Garofalo R, Kuhns LM, Pearson C, Bruce J, et al. Examining the Information Systems Success (ISS) of a mobile sexual health app (MyPEEPS Mobile) from the perspective of very young men who have sex with men (YMSM). *Int J Med Inform*. 2021 Sep 1;153.
102. Choi SK, Golinkoff J, Michna M, Connochie D, Bauermeister J. Correlates of Engagement Within an Online HIV Prevention Intervention for Single Young Men Who Have Sex With Men: Randomized Controlled Trial. *JMIR Public Health Surveill*. 2022 Jun 1;8(6).
103. Baker AM, Jahn JL, Tan ASL, Katz-Wise SL, Viswanath K, Bishop RA, et al. Sexual Health Information Sources, Needs, and Preferences of Young Adult Sexual Minority Cisgender Women and Non-binary Individuals Assigned Female at Birth. *Sexuality Research and Social Policy* [Internet]. 2021;18:775–87. Available from: <https://doi.org/10.1007/s13178-020-00501-6>
104. Mustanski B, Parsons JT, Sullivan PS, Madkins K, Rosenberg E, Swann G. Biomedical and Behavioral Outcomes of Keep It Up!: An eHealth HIV Prevention Program RCT. *Am J Prev Med*. 2018 Aug 1;55(2):151–8.
105. Dworkin M, Chakraborty A, Lee S, Monahan C, Hightow-Weidman L, Garofalo R, et al. A realistic talking human embodied agent mobile phone intervention to promote HIV medication adherence and retention in care in young HIV-positive African American men who have sex with men: Qualitative study. *JMIR Mhealth Uhealth*. 2018 Jul 1;6(7).
106. Selkie E, Adkins V, Masters E, Bajpai A, Shumer D. Transgender Adolescents' Uses of Social Media for Social Support. *Journal of Adolescent Health*. 2020 Mar 1;66(3):275–80.
107. Li DH, Moskowitz DA, Macapagal K, Saber R, Mustanski B. Using Intervention Mapping to Developmentally Adapt an Online HIV Risk Reduction Program for Adolescent Men Who Have Sex with Men. *Prevention Science*. 2020 Oct 1;21(7):885–97.
108. Bonett S, Connochie D, Golinkoff JM, Horvath KJ, Bauermeister JA. Paradata analysis of an ehealth HIV testing intervention for young men who have sex with men. *AIDS Education and Prevention*. 2018 Oct 1;30(5):434–47.
109. Berger MN, Taba M, Marino JL, Lim MSC, Cooper SC, Lewis L, et al. Social media's role in support networks among LGBTQ adolescents: a qualitative study. *Sex Health*. 2021 Nov 1;18(5):444.
110. Basaran AMB, Christensen JL, Miller LC, Appleby PR, Read SJ. The Relationship Between Social Norms and Sexual Risk-Reduction Intentions and Behavior Among Men Who Have Sex With Men: Findings From an eHealth Intervention. *Psychology of Addictive Behaviors*. 2019.
111. Flores DD, Rosario AA, Bond KT, Villarruel AM, Bauermeister JA. Parents ASSIST (Advancing Supportive and Sexuality-Inclusive Sex Talks): Iterative Development of a Sex Communication Video Series for Parents of Gay, Bisexual, and Queer Male Adolescents. *J Fam Nurs*. 2020 May 1;26(2):90–101.
112. Sequeira GM, Kidd KM, Rankine J, Miller E, Ray KN, Fortenberry JD, et al. Gender-Diverse Youth's Experiences and Satisfaction with Telemedicine for Gender-Affirming Care during the COVID-19 Pandemic. *Transgend Health*. 2022 Apr 1;7(2):127–34.
113. Biello KB, Marrow E, Mimiaga MJ, Sullivan P, Hightow-Weidman L, Mayer KH. A mobile-based app (Mychoices) to increase uptake of HIV testing and pre-exposure prophylaxis by young men who have sex with men: Protocol for a pilot randomized controlled trial. *JMIR Res Protoc*. 2019 Jan 1;8(1).
114. Madkins K, Moskowitz DA, Moran K, Dellucci T V., Mustanski B. Measuring acceptability and engagement of the keep it up! internet-based HIV prevention randomized controlled trial for young men who have sex with men. *AIDS Education and Prevention*. 2019;31(4):287–305.

115. Reback CJ, Runger D. Technology use to facilitate health care among young adult transgender women living with HIV. *AIDS Care - Psychological and Socio-Medical Aspects of AIDS/HIV*. 2020 Jun 2;32(6):785–92.
116. Brothers J, Hosek S, Keckler K, Anderson PL, Xiong D, Liu H, et al. The ATEAM study: Advances in technology to enhance PrEP adherence monitoring (ATEAM) among young men who have sex with men. *Clin Transl Sci*. 2022 Dec 1;15(12):2947–57.
117. Gannon B, Davis R, Kuhns LM, Rodriguez RG, Garofalo R, Schnall R. A mobile sexual health app on empowerment, education, and prevention for young adult men (MyPEEPS Mobile): Acceptability and usability evaluation. *JMIR Form Res*. 2020 Apr 1;4(4).
118. Tolosa-Kline A, Yom-Tov E, Hoffman C, Walker-Baban C, Lewis FMT. Trojan Horse: An Analysis of Targeted Advertising to Reduce Sexually Transmitted Diseases Among YMSM. *Health Education and Behavior*. 2021 Oct 1;48(5):637–50.
119. Baker DP, Ussher GR, Rimes KA. Development of a text-based chatroom HIV prevention and confidence-building intervention for same-sex attracted young males in South England. *J HIV AIDS Soc Serv*. 2021;20(3):262–70.
120. Reiter PL, Katz ML, Bauermeister JA, Shoben AB, Paskett ED, McRee AL. Increasing human papillomavirus vaccination among young gay and bisexual men: A randomized pilot trial of the outsmart HPV intervention. *LGBT Health*. 2018 Jul 1;5(5):325–9.
121. Mitchell JT, Legrand S, Hightow-Weidman LB, McKellar MS, Kashuba ADM, Cottrell M, et al. Smartphone-based contingency management intervention to improve pre-exposure prophylaxis adherence: pilot trial. *JMIR Mhealth Uhealth*. 2018 Sep 1;6(9).
122. Fontenot HB, White BP, Rosenberger JG, Lacasse H, Rutirasiri C, Mayer KH, et al. Mobile App Strategy to Facilitate Human Papillomavirus Vaccination among Young Men Who Have Sex with Men: Pilot Intervention Study. *J Med Internet Res*. 2020 Nov 1;22(11).
123. Lucas R, Kahn N, Bocek K, Tordoff DM, Karrington B, Richardson LP, et al. Telemedicine Utilization Among Transgender and Gender-Diverse Adolescents Before and After the COVID-19 Pandemic. *Telemedicine and e-Health*. 2023 Sep 1;29(9):1304–11.
124. Weitzman PF, Zhou Y, Kogelman L, Rodarte S, Vicente SR, Levkoff SE. MHealth for pre-exposure prophylaxis adherence by young adult men who have sex with men. *Mhealth*. 2021 Jul 1;7.
125. Fields EL, Long A, Dangerfield DT, Morgan A, Uzzi M, Arrington-Sanders R, et al. There’s an App for That: Using Geosocial Networking Apps to Access Young Black Gay, Bisexual, and other MSM at Risk for HIV. *American Journal of Health Promotion*. 2020 Jan 1;34(1):42–51.
126. Anderson A, Karczmar A, Kuhns LM, Garofalo R, Radix A, Bruce J, et al. A Qualitative Study to Inform Adaptation of MyPEEPS Mobile for Transmasculine Youth. *J Health Care Poor Underserved*. 2022 Feb 1;33(1):301–16.
127. Albury K, Dietzel C, Pym T, Vivienne S, Cook T. Not your unicorn: trans dating app users’ negotiations of personal safety and sexual health. *Health Sociology Review*. 2021;30(1):72–86.
128. Chenneville T, Drake H, Gabbidon K, Rodriguez C, Hightow-Weidman L. Bijou: Engaging Young MSM in HIV Care Using a Mobile Health Strategy. *J Int Assoc Provid AIDS Care*. 2021;20.
129. Block RG, Sampson A, Gagliardi J, Augusto B, Santiago-Datil W, Schabath MB, et al. The LOVE ECHO Training: Developing a Web-Based LGBTQ Cultural Competency Training Module for Oncology Allied Health Professionals. *J Adolesc Young Adult Oncol*. 2022 Dec 1;11(6):556–63.
130. Lee-Foon NK, Logie CH, Siddiqi A, Grace D. “I just trust what Google says, it’s the Bible”: Exploring young, Black gay and other men who have sex with men’s evaluation of sexual health information sources in Toronto, Canada. *Canadian Journal of Human Sexuality*. 2021;29(3):275–88.
131. Rhodes SD, Tanner AE, Mann-Jackson L, Alonzo J, Song EY, Smart BD, et al. Outcomes from a Randomized Trial of a Bilingual mHealth Social Media Intervention to Increase Care Engagement Among Young Gay, Bisexual, and Other Men Who Have Sex With Men and Transgender Women With HIV. *Health Education and Behavior*. 2022 Dec 1;49(6):975–84.

132. Threats M, Bond K. HIV information acquisition and use among young black men who have sex with men who use the internet: Mixed methods study. *J Med Internet Res*. 2021 May 1;23(5).
133. Menza TW, Choi SK, Legrand S, Muessig K, Hightow-Weidman L. Correlates of Self-Reported Viral Suppression among HIV-Positive, Young, Black Men Who Have Sex with Men Participating in a Randomized Controlled Trial of An Internet-Based HIV Prevention Intervention. *Sex Transm Dis*. 2018 Feb 1;45(2):118–26.
134. Kuhns LM, Hereth J, Garofalo R, Hidalgo M, Johnson AK, Schnall R, et al. A uniquely targeted, mobile app-based HIV prevention intervention for young transgender women: Adaptation and usability study. *J Med Internet Res*. 2021 Mar 1;23(3).
135. Kaufman MR, Casella A, Wiginton JM, Xu W, DuBois DL, Arrington-Sanders R, et al. Mentoring young African American men and transgender women who have sex with men on sexual health: Formative research for an HIV mobile health intervention for mentors. *JMIR Form Res*. 2020 Dec 1;4(12).
136. Hedrick HR, Glover NT, Guerriero JT, Connelly KJ, Moyer DN. A New Virtual Reality: Benefits and Barriers to Providing Pediatric Gender-Affirming Health Care Through Telehealth. *Transgend Health*. 2022 Apr 1;7(2):144–9.
137. Houston E, Fadardi JS, Harawa NT, Argueta C, Mukherjee S. Individualized web-based attention training with evidence-based counseling to address HIV treatment adherence and psychological distress: exploratory cohort study. *JMIR Ment Health*. 2021 Jan 1;8(1).
138. Poquiz JL, Shrodes A, Garofalo R, Chen D, Coyne CA. Supporting Pride, Activism, Resiliency, and Community: A Telemedicine-Based Group for Youth with Intersecting Gender and Racial Minority Identities. *Transgend Health*. 2022 Apr 1;7(2):179–84.
139. Tanner AE, Mann-Jackson L, Song EY, Alonzo J, Schafer KR, Ware S, et al. Supporting Health Among Young Men Who Have Sex With Men and Transgender Women With HIV: Lessons Learned From Implementing the weCare Intervention. *Health Promot Pract*. 2020 Sep 1;21(5):755–63.
140. Lee JY, Eimicke T, Rehm JL, Connelly KJ, Roberts SA. Providing Gender-Affirmative Care during the Severe Acute Respiratory Syndrome Coronavirus 2 Pandemic Era: Experiences and Perspectives from Pediatric Endocrinologists in the United States. *Transgend Health*. 2022 Apr 1;7(2):170–4.
141. Arayasirikul S, Trujillo D, Turner CM, Le V, Wilson EC. Implementing a digital HIV care navigation intervention (Health ENAV): Protocol for a feasibility study. *JMIR Res Protoc*. 2019 Nov 1;8(11).
142. Fields EL, Thornton N, Long A, Morgan A, Uzzi M, Arrington-Sanders R, et al. Young black MSM's exposures to and discussions about PrEP while navigating geosocial networking apps. *J LGBT Youth*. 2021;18(1):23–39.
143. Apple DE, Lett E, Wood S, Freeman Baber K, Chuo J, Schwartz LA, et al. Acceptability of Telehealth for Gender-Affirming Care in Transgender and Gender Diverse Youth and Their Caregivers. *Transgend Health*. 2022 Apr 1;7(2):159–64.
144. Frye V, Nandi V, Hirshfield S, Chiasson MA, Wilton L, Usher D, et al. Randomized Controlled Trial of an Intervention to Match Young Black Men and Transwomen Who Have Sex with Men or Transwomen to HIV Testing Options in New York City (All about Me). *J Acquir Immune Defic Syndr (1988)*. 2020 Jan 1;83(1):31–6.
145. Hightow-Weidman LB, Muessig K, Soberano Z, Rosso MT, Currie A, Adams Larsen M, et al. Tough Talks Virtual Simulation HIV Disclosure Intervention for Young Men Who Have Sex with Men: Development and Usability Testing. *JMIR Form Res*. 2022 Sep 1;6(9).
146. Sosnowy C, Predmore Z, Dean LT, Raifman J, Chu C, Galipeau D, et al. Paying for PrEP: A qualitative study of cost factors that impact pre-exposure prophylaxis uptake in the US. *Int J STD AIDS*. 2022 Dec 21;33(14):1199–205.



147. Himmelstein DU, Jun M, Busse R, Chevreul K, Geissler A, Jeurissen P, et al. A Comparison Of Hospital Administrative Costs In Eight Nations: US Costs Exceed All Others By Far. *Health Aff.* 2014 Sep;33(9):1586–94.
148. Burki T. From health service to national identity: the NHS at 70. *The Lancet.* 2018 Jul;392(10141):15–7.
149. Lorimer K, DeAmicis L, Dalrymple J, Frankis J, Jackson L, Lorgelly P, et al. A Rapid Review of Sexual Wellbeing Definitions and Measures: Should We Now Include Sexual Wellbeing Freedom? *J Sex Res.* 2019 Sep 2;56(7):843–53.
150. Eleuteri S, Toso M. How the smartphone apps can improve your sexual wellbeing. *Int J Impot Res.* 2023.
151. Mitchell KR, Lewis R, O’Sullivan LF, Fortenberry JD. What is sexual wellbeing and why does it matter for public health? *Lancet Public Health.* 2021 Aug 1;6(8):e608–13.
152. O’Farrell M, Corcoran P, Davoren MP. Examining LGBTI+ inclusive sexual health education from the perspective of both youth and facilitators: A systematic review. *BMJ Open.* 2021 Sep 2;11(9).
153. Hossain AD, Jarolimova J, Elnaiem A, Huang CX, Richterman A, Ivers LC. Effectiveness of contact tracing in the control of infectious diseases: a systematic review. *Lancet Public Health.* 2022 Mar 1;7(3):e259–73.
154. Saewyc EM. Adolescent Pregnancy Among Lesbian, Gay, and Bisexual Teens. In: Cherry AL, Dillon ME, editors. *International Handbook of Adolescent Pregnancy: Medical, Psychosocial, and Public Health Responses.* 2014. p. 159–69.
155. Saewyc EM, Poon CS, Homma Y, Skay CL. Stigma management? The links between enacted stigma and teen pregnancy trends among gay, lesbian, and bisexual students in British Columbia. *The Canadian Journal of Human Sexuality.* 2008;17(3):123–39.
156. Leonardi M, Frecker H, Scheim AI, Kives S. Reproductive Health Considerations in Sexual and/or Gender Minority Adolescents. *J Pediatr Adolesc Gynecol.* 2019 Feb 1;32(1):15–20.
157. Chen D, Matson M, Macapagal K, Johnson EK, Rosoklija I, Finlayson C, et al. Attitudes Toward Fertility and Reproductive Health Among Transgender and Gender-Nonconforming Adolescents. *Journal of Adolescent Health.* 2018 Jul 1;63(1):62–8.
158. Nahata L, Chen D, Moravek MB, Quinn GP, Sutter ME, Taylor J, et al. Understudied and Under-Reported: Fertility Issues in Transgender Youth—A Narrative Review. *Journal of Pediatrics.* 2019 Feb 1;205:265–71.
159. McCormick M, Allen E, Wadsworth PJ, Gulliver B. Exploring TGE Young Adults’ Experiences Seeking Health Information and Healthcare. *Youth.* 2023 Jan 11;3(1):33–49.
160. Robinson L, Schulz J, Blank G, Ragnedda M, Ono H, Hogan B, et al. Digital inequalities and the COVID-19 pandemic 2.0: Implications of legacy digital inequalities. *First Monday [Internet].* 2020 [cited 2023 Aug 7];25(7):1–27. Available from: <https://firstmonday.org/ojs/index.php/fm/article/view/10842>
161. van Hooff J, Morris SP. Sexual Wellbeing and Social Class in Britain: An Analysis of Nationally Representative Survey Data. *Sociol Res Online.* 2020;26(2):288–308.
162. McDaid L, Hunt K, McMillan L, Russell S, Milne D, Ilett R, et al. Absence of holistic sexual health understandings among men and women in deprived areas of Scotland: Qualitative study. *BMC Public Health.* 2019 Mar 12;19(1).
163. Solomon D, Gibbs J, Burns F, Mohammed H, Migchelsen SJ, Sabin CA. Inequalities in sexual and reproductive outcomes among women aged 16–24 in England (2012–2019). *J Epidemiol Community Health (1978).* 2024 Apr 12;jech-2023-220835.
164. Michie S, Atkins L, West R. *The behaviour change wheel: a guide to designing interventions.* Silverback Publishing; 2014. 1–329 p.

165. Alexander L, Cooper K, Peters MDJ, Tricco AC, Khalil H, Evans C, et al. Large scoping reviews: managing volume and potential chaos in a pool of evidence sources. *J Clin Epidemiol*. 2024 Jun;170:111343.
166. Ewald H, Klerings I, Wagner G, Heise TL, Stratil JM, Lhachimi SK, et al. Searching two or more databases decreased the risk of missing relevant studies: a metaresearch study. *J Clin Epidemiol*. 2022 Sep;149:154–64.
167. Stoll CRT, Izadi S, Fowler S, Green P, Suls J, Colditz GA. The value of a second reviewer for study selection in systematic reviews. *Res Synth Methods*. 2019 Dec 18;10(4):539–45.
168. YoungScot. YoungScot. 2022 [cited 2023 Feb 17]. Gender Identity Terms. Available from: <https://young.scot/get-informed/gender-identity-terms>
169. Stonewall. Stonewall. [cited 2023 Feb 17]. Easy Read Learn more about us Contents. Available from: <https://www.stonewall.org.uk/list-lgbtq-terms>
170. Diamond LM. Gender Fluidity and Nonbinary Gender Identities Among Children and Adolescents. *Child Dev Perspect*. 2020 Jun 1;14(2):110–5.
171. Lee JY, Rosenthal SM. Gender-Affirming Care of Transgender and Gender-Diverse Youth: Current Concepts. *Annu Rev Med* [Internet]. 2023;74:107–16. Available from: <https://doi.org/10.1146/annurev-med-043021->
172. Bhatt N, Cannella J, Gentile JP. Gender-affirming Care for Transgender Patients. *Innov Clin Neurosci*. 2022;19:23–32.
173. Chen D, Hidalgo MA, Leibowitz S, Leininger J, Simons L, Finlayson C, et al. Multidisciplinary Care for Gender-Diverse Youth: A Narrative Review and Unique Model of Gender-Affirming Care. *Transgend Health*. 2016 Jan 1;1(1):117–23.
174. Coleman E, Bockting W, Botzer M, Cohen-Kettenis P, DeCuypere G, Feldman J, et al. Standards of Care for the Health of Transsexual, Transgender, and Gender-Nonconforming People, Version 7. *International Journal of Transgenderism*. 2012 Aug;13(4):165–232.
175. Hidalgo MA, Ehrensaft D, Tishelman AC, Clark LF, Garofalo R, Rosenthal SM, et al. The gender affirmative model: What we know and what we aim to learn. *Hum Dev*. 2013;56(5):285–90.
176. Defreyne J, Vander Stichele C, Iwamoto SJ, T’Sjoen G. Gender-affirming hormonal therapy for transgender and gender-diverse people—A narrative review. *Best Pract Res Clin Obstet Gynaecol*. 2023 Feb 1;86.
177. Miller TJ, Wilson SC, Massie JP, Morrison SD, Satterwhite T. Breast augmentation in male-to-female transgender patients: Technical considerations and outcomes. *JPRAS Open*. 2019 Sep 1;21:63–74.
178. Ferreira A, Young T, Mathews C, Zunza M, Low N. Strategies for partner notification for sexually transmitted infections, including HIV. *Cochrane Database of Systematic Reviews*. 2013 Oct 3;2013(10).
179. Spinner CD, Boesecke C, Zink A, Jessen H, Stellbrink HJ, Rockstroh JK, et al. HIV pre-exposure prophylaxis (PrEP): a review of current knowledge of oral systemic HIV PrEP in humans. *Infection*. 2016 Apr 15;44(2):151–8.
180. World Health Organization. World health Organization. [cited 2024 May 17]. Defining sexual health. Available from: <https://www.who.int/teams/sexual-and-reproductive-health-and-research/key-areas-of-work/sexual-health/defining-sexual-health>
181. Naidoo J, Wills J. *Foundations for Health Promotion* [Internet]. 4th ed. Elsevier. Elsevier; 2016 [cited 2024 Jan 10]. Available from: [https://www.google.co.uk/books/edition/Foundations\\_for\\_Health\\_Promotion\\_E\\_Book/OkHdCwAAQBAJ?hl=en&gbpv=1](https://www.google.co.uk/books/edition/Foundations_for_Health_Promotion_E_Book/OkHdCwAAQBAJ?hl=en&gbpv=1)
182. Marcell A V, Burstein GR. Sexual and Reproductive Health Care Services in the Pediatric Setting. *Pediatrics* [Internet]. 2017;140(5):e20172858. Available from: [http://publications.aap.org/pediatrics/article-pdf/140/5/e20172858/908750/peds\\_20172858.pdf](http://publications.aap.org/pediatrics/article-pdf/140/5/e20172858/908750/peds_20172858.pdf)

183. Hall KS, Samari G, Garbers S, Casey SE, Diallo DD, Orcutt M, et al. Centering sexual and reproductive health and justice in the global COVID-19 response. *The Lancet*. 2020;395:1175–7.
184. Bosó Pérez R, Reid D, Maxwell KJ, Gibbs J, Dema E, Bonell C, et al. Access to and quality of sexual and reproductive health services in Britain during the early stages of the COVID-19 pandemic: A qualitative interview study of patient experiences. *BMJ Sex Reprod Health*. 2022 Apr 20;49(1):12–20.
185. Martin SL, Young SK, Billings DL, Bross C. Health care-based interventions for women who have experienced sexual violence: A review of the literature. *Trauma Violence Abuse*. 2007 Jan;8(1):3–18.
186. Monester J, Fisher J, Kirkman M, Rowe H, Holton S. ‘If I had known the fertility health facts sooner...’ Knowledge gaps as a barrier to effective fertility management: findings from the understanding fertility management in contemporary Australia survey. *The European Journal of Contraception & Reproductive Health Care*. 2019 Jul 4;24(4):274–9.
187. Zaneva M, Philpott A, Singh A, Larsson G, Gonsalves L. What is the added value of incorporating pleasure in sexual health interventions? A systematic review and meta-analysis. *PLoS One*. 2022 Feb 1;17(2 February).
188. Gruskin S, Yadav V, Castellanos-Usigli A, Khizanishvili G, Kismödi E. Sexual health, sexual rights and sexual pleasure: meaningfully engaging the perfect triangle. *Sex Reprod Health Matters*. 2019 Jan 1;27(1):29–40.
189. Rich CW, Domar AD. Addressing the emotional barriers to access to reproductive care. *Fertil Steril*. 2016 May;105(5):1124–7.
190. World Health Organization. World Health Organization. [cited 2024 May 17]. Adolescent health. Available from: [https://www.who.int/health-topics/adolescent-health#tab=tab\\_1](https://www.who.int/health-topics/adolescent-health#tab=tab_1)
191. Decker MJ, Atyam T V., Zárate CG, Bayer AM, Bautista C, Saphir M. Adolescents’ perceived barriers to accessing sexual and reproductive health services in California: a cross-sectional survey. *BMC Health Serv Res*. 2021 Dec 1;21(1).
192. McRee A, Esber A, Reiter PL. Acceptability of Home-Based Chlamydia And Gonorrhea Testing Among a National Sample Of Sexual Minority Young Adults. *Perspect Sex Reprod Health*. 2015 Mar;47(1):3–10.
193. Perovic B. DEFINING YOUTH IN CONTEMPORARY NATIONAL LEGAL AND POLICY FRAMEWORKS ACROSS EUROPE [Internet]. European Union. 2016 [cited 2023 Feb 24]. Available from: <https://pjp-eu.coe.int/documents/42128013/47261653/Analytical+paper+Youth+Age+Bojana+Perovic+4.4.16.pdf/eb59c5e2-45d8-4e70-b672-f8de0a5ca08c>
194. Step MM, Smith JMM, Lewis SA, Avery AK. Using the Positive Peers Mobile App to Improve Clinical Outcomes for Young People With HIV: Prospective Observational Cohort Comparison. *JMIR Mhealth Uhealth*. 2022 Sep 1;10(9).
195. Gibbs J, Solomon D, Jackson L, Mullick S, Burns F, Shahmanesh M. Measuring and evaluating sexual health in the era of digital health: challenges and opportunities. *Sex Health*. 2022 Aug 16;19(4):336–45.
196. Radix AE, Bond K, Carneiro PB, Restar A. Transgender Individuals and Digital Health. *Curr HIV/AIDS Rep*. 2022 Dec 1;19(6):592–9.
197. Knight RE, Shoveller JA, Carson AM, Contreras-Whitney JG. Examining clinicians’ experiences providing sexual health services for LGBTQ youth: Considering social and structural determinants of health in clinical practice. *Health Educ Res*. 2014;29(4):662–70.
198. Woodward C, Bloch S, McInnes-Dean A, Lloyd KC, McLeod J, Saunders J, et al. Digital interventions for STI and HIV partner notification: a scoping review. *Sex Transm Infect* [Internet]. 2024 May 16;sextrans-2023-056097. Available from: <https://sti.bmj.com/lookup/doi/10.1136/sextrans-2023-056097>

199. Salvetti BM. Impact of a Web-based Decision Aid for Gender Affirming Treatment. University of California, Doctoral Theses. 2022.
200. West R, Okecha E, Forbes K. P52 Keeping “app” to date: using geolocation apps to signpost to local sexual health services. *Sex Transm Infect.* 2015 Jun 18;91(Suppl 1):A32.3-A33.
201. Brady M, Howroyd C, Parry G, Baraitser P, Holdsworth G, Menon-Johansson A. 020 ON-LINE STI TESTING SERVICES: IMPROVING ACCESS, EFFICIENCY AND USER EXPERIENCE. *Sex Transm Infect.* 2015;91(Suppl 1):A1–104.
202. Shipherd JC, Kauth MR, Matza A. Nationwide Interdisciplinary E-Consultation on Transgender Care in the Veterans Health Administration. *Telemedicine and e-Health.* 2016 Dec 1;22(12):1008–12.
203. Blosnich JR, Rodriguez KL, Hruska KL, Kavalieratos D, Gordon AJ, Matza A, et al. Utilization of the veterans affairs’ transgender e-consultation program by health care providers: Mixed-methods study. *JMIR Med Inform.* 2019 Jan 1;7(1).
204. Germain A, Sen G, Garcia-Moreno C, Shankar M. Advancing sexual and reproductive health and rights in low- and middle-income countries: Implications for the post-2015 global development agenda. *Glob Public Health.* 2015 Feb 7;10(2):137–48.
205. Gottlieb SL, Low N, Newman LM, Bolan G, Kamb M, Broutet N. Toward global prevention of sexually transmitted infections (STIs): The need for STI vaccines. *Vaccine.* 2014 Mar 20;32(14):1527–35.
206. Presseau J, McCleary N, Lorencatto F, Patey AM, Grimshaw JM, Francis JJ. Action, actor, context, target, time (AACTT): A framework for specifying behaviour. *Implementation Science.* 2019 Dec 5;14(1).
207. Holloway IW, Rice E, Gibbs J, Winetrobe H, Dunlap S, Rhoades H. Acceptability of smartphone application-based HIV prevention among young men who have sex with men. *AIDS Behav.* 2014 Feb 1;18(2):285–96.
208. Mustanski B, Greene GJ, Ryan D, Whitton SW. Feasibility, Acceptability, and Initial Efficacy of an Online Sexual Health Promotion Program for LGBT Youth: The Queer Sex Ed Intervention. *The Journal of Sex Research.* 2015 Feb 12;52(2):220–30.
209. Russell ST, Pollitt AM, Li G, Grossman AH. Chosen Name Use Is Linked to Reduced Depressive Symptoms, Suicidal Ideation, and Suicidal Behavior Among Transgender Youth. *Journal of Adolescent Health.* 2018 Oct 1;63(4):503–5.
210. Tordoff DM, Wanta JW, Collin A, Stepney C, Inwards-Breland DJ, Ahrens K. Mental Health Outcomes in Transgender and Nonbinary Youths Receiving Gender-Affirming Care. *JAMA Netw Open.* 2022 Feb 25;5(2).
211. Sorbara JC, Chiniara LN, Thompson S, Palmert MR. Mental Health and Timing of Gender-Affirming Care. *Pediatrics.* 2020 Oct 1;146(4).
212. Hickson F, Tomlin K, Hargreaves J, Bonell C, Reid D, Weatherburn P. Internet-based cohort study of HIV testing over 1 year among men who have sex with men living in England and exposed to a social marketing intervention promoting testing. *Sex Transm Infect.* 2015 Feb 1;91(1):24–30.
213. Quaglio GL, Dario C, Karapiperis T, Delponte L, McCormack S, Tomson G, et al. Information and communications technologies in low and middle-income countries: Survey results on economic development and health. *Health Policy Technol.* 2016 Dec 1;5(4):318–29.
214. Iyer D, Merouani W, Abdelraof N. Social protection systems and the response to COVID-19 in the Arab region [Internet]. United Nations Development Programme. 2021 [cited 2023 May 5]. Available from: [https://www.ilo.org/wcmsp5/groups/public/---americas/---ro-lima/---sro-port\\_of\\_spain/documents/publication/wcms\\_858730.pdf](https://www.ilo.org/wcmsp5/groups/public/---americas/---ro-lima/---sro-port_of_spain/documents/publication/wcms_858730.pdf)
215. Adema. Willem, Fron P, Ladaique. Maxime. OECDStatistics. 2023 [cited 2023 Apr 20]. Sizing up Welfare States: How to OECD countries compare?. Available from: <https://oecdstatistics.blog/2023/02/02/sizing-up-welfare-states-how-do-oecd-countries-compare/>

216. OECDStatistics. OECDStatistics. 2019 [cited 2023 Apr 20]. Social Expenditure – Aggregated Data. Available from: [https://stats.oecd.org/Index.aspx?DataSetCode=SOCX\\_AGG](https://stats.oecd.org/Index.aspx?DataSetCode=SOCX_AGG)
217. ILO Decent Work Team and Office for the Caribbean. Social Protection Expenditure Review, Barbados [Internet]. International Labour Organization. 2022 [cited 2023 May 5]. Available from: [https://www.ilo.org/wcmsp5/groups/public/---americas/---ro-lima/---ro-port\\_of\\_spain/documents/publication/wcms\\_858730.pdf](https://www.ilo.org/wcmsp5/groups/public/---americas/---ro-lima/---ro-port_of_spain/documents/publication/wcms_858730.pdf)
218. International Labour Organization. World Social Protection Report 2020-22: Social protection at the crossroads - in pursuit of a better future [Internet]. International Labour Organization. 2021 [cited 2023 May 5]. Available from: [https://www.ilo.org/wcmsp5/groups/public/@ed\\_protect/@soc\\_sec/documents/publication/wcms\\_817572.pdf](https://www.ilo.org/wcmsp5/groups/public/@ed_protect/@soc_sec/documents/publication/wcms_817572.pdf)
219. Kanchoo V. SOCIAL PROTECTION AND WELFARE STATE BUILDING: FAST AND SLOW LESSONS [Internet]. United nations ESCAP. 2019 [cited 2023 May 5]. Available from: <https://repository.unescap.org/bitstream/handle/20.500.12870/1225/ESCAP-2019-WP-Social-protection-and-welfare-state-building.pdf?sequence=1&isAllowed=y>
220. European Commission. European Commission. [cited 2023 May 5]. Employment, social affairs & inclusion: Your rights by country. Available from: <https://ec.europa.eu/social/main.jsp?catId=858&langId=en>
221. Azzopardi Muscat N, Calleja N, Buttigieg S, Merkur S. Malta: health system review [Internet]. Vol. 19, Health Systems in Transition. 2017 [cited 2023 May 5]. Available from: <https://eurohealthobservatory.who.int/publications/i/malta-health-system-review-2017>
222. Konkov A. Welfare System in Contemporary Russia and its Implication for Sakhalin Region. Vol. 11, Journal of Policy Science. 2017.
223. Robles C, Vargas LH. Social protection systems in Latin America and the Caribbean: Trinidad and Tobago [Internet]. Economic Commission for Latin America and the Caribbean (ECLAC). 2012 [cited 2023 May 5]. Available from: [https://repositorio.cepal.org/bitstream/handle/11362/4039/S1201017\\_en.pdf](https://repositorio.cepal.org/bitstream/handle/11362/4039/S1201017_en.pdf)
224. Arbulo V, Castelao G, Juan IO, Pagano P. IMPROVING HEALTH SYSTEM EFFICIENCY Health Systems Governance & Financing: URUGUAY Building up the national integrated health system [Internet]. World Health Organisation. 2015 [cited 2023 May 3]. Available from: <https://apps.who.int/iris/handle/10665/187934>
225. Jimba M, Fujimura MS, Ong KIC. Developing country: an outdated term in The Lancet. The Lancet. 2019;394:918.
226. McDermott E, Nelson R, Weeks H. The politics of LGBT+ health inequality: Conclusions from a UK scoping review. Int J Environ Res Public Health. 2021 Jan 2;18(2):1–35.
227. Norman G, Mason T, Dumville JC, Bower P, Wilson P, Cullum N. Approaches to enabling rapid evaluation of innovations in health and social care: a scoping review of evidence from high-income countries. BMJ Open. 2022 Dec 1;12(12).
228. Yousaf H, Currie S. Enabling, Connecting and Empowering: Care in the Digital Age [Internet]. Scottish Government. 2021 [cited 2023 Aug 8]. Available from: <https://www.gov.scot/binaries/content/documents/govscot/publications/strategy-plan/2021/10/scotlands-digital-health-care-strategy/documents/enabling-connecting-empowering-care-digital-age/enabling-connecting-empowering-care-digital-age/govscot%3Adocument>
229. Robinson S, Johnston P. Scotland’s Digital Health & Care Strategy: Enabling, Connecting & Empowering [Internet]. Scottish Government. 2018 [cited 2023 Aug 7]. Available from: <https://www.gov.scot/binaries/content/documents/govscot/publications/strategy-plan/2018/04/scotlands-digital-health-care-strategy-enabling-connecting-empowering/documents/00534657-pdf/00534657-pdf/govscot%3Adocument/00534657.pdf>
